# Supplementary material for: Novel functions of the luteinizing hormone/chorionic gonadotropin receptor in prostate cancer cells and patients
Source: PLoS One. 2020 Sep 3;15(9):e0238814. doi: 10.1371/journal.pone.0238814 (PMC7470326; doi:10.1371/journal.pone.0238814)
Supplement: S1 Data — (XLSX) [file pone.0238814.s006.xlsx]

## Sheet: BRDU data
OD;stim_type;Cell_type
1.304187192;No stimulation;LNCaP
0.890394089;No stimulation;LNCaP
0.834975369;No stimulation;LNCaP
0.827586207;No stimulation;LNCaP
0.757389163;No stimulation;LNCaP
0.775862069;No stimulation;LNCaP
1.640394089;No stimulation;LNCaP
0.583743842;No stimulation;LNCaP
1.141625616;No stimulation;LNCaP
0.34729064;No stimulation;LNCaP
0.853448276;No stimulation;LNCaP
2.043103448;No stimulation;LNCaP
1.060058034;No stimulation;LNCaP
0.661650584;No stimulation;LNCaP
1.088400027;No stimulation;LNCaP
1.301369863;No stimulation;LNCaP
1.202577772;No stimulation;LNCaP
1.290033066;No stimulation;LNCaP
1.107834537;No stimulation;LNCaP
0.932114178;No stimulation;LNCaP
0.712666172;No stimulation;LNCaP
0.839800256;No stimulation;LNCaP
0.68513395;No stimulation;LNCaP
1.118361563;No stimulation;LNCaP
1.060058034;No stimulation;LNCaP
0.661650584;No stimulation;LNCaP
1.088400027;No stimulation;LNCaP
1.301369863;No stimulation;LNCaP
1.202577772;No stimulation;LNCaP
1.290033066;No stimulation;LNCaP
1.107834537;No stimulation;LNCaP
0.932114178;No stimulation;LNCaP
0.712666172;No stimulation;LNCaP
0.839800256;No stimulation;LNCaP
0.68513395;No stimulation;LNCaP
1.118361563;No stimulation;LNCaP
1.104679803;LH;LNCaP
1.233990148;LH;LNCaP
1.740147783;LH;LNCaP
1.610837438;LH;LNCaP
1.880541872;LH;LNCaP
2.434729064;LH;LNCaP
2.268472906;LH;LNCaP
1.112068966;LH;LNCaP
1.577586207;LH;LNCaP
2.298029557;LH;LNCaP
2.434729064;LH;LNCaP
2.405172414;LH;LNCaP
1.375059046;LH;LNCaP
0.97260274;LH;LNCaP
0.918348067;LH;LNCaP
1.607463392;LH;LNCaP
1.048721236;LH;LNCaP
0.926445779;LH;LNCaP
1.079492543;LH;LNCaP
0.729671368;LH;LNCaP
0.84222957;LH;LNCaP
1.080302315;LH;LNCaP
0.558809636;LH;LNCaP
1.076253458;LH;LNCaP
1.375059046;LH;LNCaP
0.97260274;LH;LNCaP
0.918348067;LH;LNCaP
1.607463392;LH;LNCaP
1.048721236;LH;LNCaP
0.926445779;LH;LNCaP
1.079492543;LH;LNCaP
0.729671368;LH;LNCaP
0.84222957;LH;LNCaP
1.080302315;LH;LNCaP
0.558809636;LH;LNCaP
1.076253458;LH;LNCaP
2.157635468;hCG;LNCaP
1.570197044;hCG;LNCaP
1.492610837;hCG;LNCaP
2.002463054;hCG;LNCaP
2.268472906;hCG;LNCaP
1.721674877;hCG;LNCaP
1.629310345;hCG;LNCaP
1.651477833;hCG;LNCaP
1.647783251;hCG;LNCaP
1.61453202;hCG;LNCaP
1.906403941;hCG;LNCaP
1.980295567;hCG;LNCaP
1.331331399;hCG;LNCaP
1.034145354;hCG;LNCaP
1.134556988;hCG;LNCaP
1.194480059;hCG;LNCaP
0.965314799;hCG;LNCaP
1.005803361;hCG;LNCaP
1.268169242;hCG;LNCaP
0.843849113;hCG;LNCaP
0.814697348;hCG;LNCaP
0.919157838;hCG;LNCaP
0.899723328;hCG;LNCaP
1.085160942;hCG;LNCaP
1.331331399;hCG;LNCaP
1.034145354;hCG;LNCaP
1.134556988;hCG;LNCaP
1.194480059;hCG;LNCaP
0.965314799;hCG;LNCaP
1.005803361;hCG;LNCaP
1.268169242;hCG;LNCaP
0.843849113;hCG;LNCaP
0.814697348;hCG;LNCaP
0.919157838;hCG;LNCaP
0.899723328;hCG;LNCaP
1.085160942;hCG;LNCaP
0.354771956;No stimulation;PC-3
0.883205033;No stimulation;PC-3
0.547471236;No stimulation;PC-3
0.615015313;No stimulation;PC-3
0.752090059;No stimulation;PC-3
0.930883205;No stimulation;PC-3
0.884198328;No stimulation;PC-3
1.522887178;No stimulation;PC-3
1.681814419;No stimulation;PC-3
1.070937836;No stimulation;PC-3
0.862345832;No stimulation;PC-3
1.894379604;No stimulation;PC-3
1.094660939;No stimulation;PC-3
0.951979135;No stimulation;PC-3
1.067965634;No stimulation;PC-3
1.156336299;No stimulation;PC-3
0.974071801;No stimulation;PC-3
0.877416385;No stimulation;PC-3
0.887542191;No stimulation;PC-3
0.821264191;No stimulation;PC-3
0.804694692;No stimulation;PC-3
0.847959497;No stimulation;PC-3
1.134243633;No stimulation;PC-3
1.381865603;No stimulation;PC-3
0.983973679;No stimulation;PC-3
0.756633411;No stimulation;PC-3
0.889726173;No stimulation;PC-3
1.440564636;No stimulation;PC-3
0.954680535;No stimulation;PC-3
1.24060709;No stimulation;PC-3
1.40936107;No stimulation;PC-3
0.412757376;No stimulation;PC-3
1.316387179;No stimulation;PC-3
0.506368075;No stimulation;PC-3
0.652833793;No stimulation;PC-3
1.436106984;No stimulation;PC-3
2.281764755;LH;PC-3
1.977816406;LH;PC-3
2.321496565;LH;PC-3
1.529840245;LH;PC-3
2.291697707;LH;PC-3
2.005628673;LH;PC-3
0.924923433;LH;PC-3
1.482162073;LH;PC-3
1.654002152;LH;PC-3
2.072179455;LH;PC-3
1.209999172;LH;PC-3
1.139475209;LH;PC-3
1.203283216;LH;PC-3
1.089137772;LH;PC-3
1.145289966;LH;PC-3
1.017336606;LH;PC-3
1.112150967;LH;PC-3
0.846118441;LH;PC-3
1.087296717;LH;PC-3
1.094660939;LH;PC-3
0.756827248;LH;PC-3
0.88386008;LH;PC-3
0.930806996;LH;PC-3
1.109389383;LH;PC-3
1.038739121;LH;PC-3
1.259074506;LH;PC-3
1.417639567;LH;PC-3
0.910104012;LH;PC-3
1.395988113;LH;PC-3
1.289004458;LH;PC-3
0.932392273;LH;PC-3
1.494693271;LH;PC-3
0.94576523;LH;PC-3
1.426554872;LH;PC-3
1.111335173;LH;PC-3
1.468584165;LH;PC-3
0.995447397;hCG;PC-3
;hCG;PC-3
1.341114146;hCG;PC-3
1.757304859;hCG;PC-3
2.106944789;hCG;PC-3
2.084098998;hCG;PC-3
1.925171757;hCG;PC-3
1.550699445;hCG;PC-3
1.871533813;hCG;PC-3
1.448390034;hCG;PC-3
0.912010595;hCG;PC-3
1.525867064;hCG;PC-3
0.871893219;hCG;PC-3
0.833231052;hCG;PC-3
0.836913164;hCG;PC-3
0.76419147;hCG;PC-3
0.711721387;hCG;PC-3
0.662012887;hCG;PC-3
0.742098803;hCG;PC-3
0.777078859;hCG;PC-3
0.811138386;hCG;PC-3
0.818502608;hCG;PC-3
0.720926665;hCG;PC-3
1.036667689;hCG;PC-3
0.8324135;hCG;PC-3
0.861069837;hCG;PC-3
0.754086181;hCG;PC-3
0.457970707;hCG;PC-3
0.340798132;hCG;PC-3
0.959138187;hCG;PC-3
0.578964127;hCG;PC-3
0.923476969;hCG;PC-3
0.95085969;hCG;PC-3
0.815219699;hCG;PC-3
1.065485035;hCG;PC-3
1.492782849;hCG;PC-3
0.967176758;No stimulation;DU145
1.051009093;No stimulation;DU145
1.238633843;No stimulation;DU145
1.286538035;No stimulation;DU145
1.387669106;No stimulation;DU145
0.597249945;No stimulation;DU145
0.979152806;No stimulation;DU145
0.795520071;No stimulation;DU145
0.859392326;No stimulation;DU145
1.261255267;No stimulation;DU145
0.66777556;No stimulation;DU145
0.90862719;No stimulation;DU145
0.889864423;No stimulation;DU145
1.105970271;No stimulation;DU145
1.042755635;No stimulation;DU145
1.035405096;No stimulation;DU145
0.831550147;No stimulation;DU145
0.99032179;No stimulation;DU145
0.981501143;No stimulation;DU145
0.969740281;No stimulation;DU145
1.083428618;No stimulation;DU145
0.971700425;No stimulation;DU145
1.086368834;No stimulation;DU145
1.011393336;No stimulation;DU145
0.887047629;No stimulation;DU145
0.973004758;No stimulation;DU145
0.95696798;No stimulation;DU145
0.888972043;No stimulation;DU145
0.896669696;No stimulation;DU145
0.773507243;No stimulation;DU145
1.137862832;No stimulation;DU145
1.011493024;No stimulation;DU145
1.050622762;No stimulation;DU145
1.154541081;No stimulation;DU145
1.026888331;No stimulation;DU145
1.242422623;No stimulation;DU145
0.900643158;LH;DU145
0.88201375;LH;DU145
1.070969173;LH;DU145
1.588600577;LH;DU145
1.419605234;LH;DU145
1.451541362;LH;DU145
0.96185407;LH;DU145
1.011088933;LH;DU145
0.590596585;LH;DU145
0.937901974;LH;DU145
1.21601242;LH;DU145
1.331780883;LH;DU145
1.107930415;LH;DU145
0.554189807;LH;DU145
1.033934989;LH;DU145
0.99277197;LH;DU145
1.132432212;LH;DU145
1.115280954;LH;DU145
1.141252859;LH;DU145
1.07117772;LH;DU145
1.038835348;LH;DU145
0.925147011;LH;DU145
1.008943156;LH;DU145
1.047165959;LH;DU145
1.080771904;LH;DU145
1.085903672;LH;DU145
1.231517614;LH;DU145
1.030095686;LH;DU145
1.074998664;LH;DU145
0.983268295;LH;DU145
1.094242797;LH;DU145
0.955685038;LH;DU145
1.03843481;LH;DU145
1.076923077;LH;DU145
0.845352007;LH;DU145
0.935799433;LH;DU145
1.18939898;hCG;DU145
1.213351076;hCG;DU145
0.575959193;hCG;DU145
0.715679752;hCG;DU145
0.867376358;hCG;DU145
0.880683078;hCG;DU145
0.803504103;hCG;DU145
0.472166778;hCG;DU145
0.799512087;hCG;DU145
0.87536039;hCG;DU145
0.887336438;hCG;DU145
0.631847416;hCG;DU145
0.930537406;hCG;DU145
1.053536426;hCG;DU145
0.956999347;hCG;DU145
0.946708592;hCG;DU145
0.905055537;hCG;DU145
0.931027442;hCG;DU145
0.980031036;hCG;DU145
0.968270173;hCG;DU145
1.12900196;hCG;DU145
0.985911467;hCG;DU145
0.996202221;hCG;DU145
1.036385168;hCG;DU145
0.973646229;hCG;DU145
1.015341851;hCG;DU145
0.920404127;hCG;DU145
0.988400064;hCG;DU145
0.981985353;hCG;DU145
1.002512429;hCG;DU145
1.022398033;hCG;DU145
0.901801465;hCG;DU145
0.969155931;hCG;DU145
0.974929171;hCG;DU145
0.919121185;hCG;DU145
0.944780029;hCG;DU145

## Sheet: qPCR LHCGR data
LHCGR
Prostate;No stimulation;0,98157268
LNCaP;No stimulation;0,054193263
LNCaP;No stimulation;0,222196013
LNCaP;No stimulation;0,071075739
LNCaP;hCG;0,517346581
LNCaP;hCG;0,134298491
LNCaP;hCG;0,739524236
LNCaP;LH;0,198345146
LNCaP;LH;0,031425649
LNCaP;LH;0,336909185
PC-3;No stimulation;0,024526329
PC-3;No stimulation;0,071869538
PC-3;No stimulation;0,289859818
PC-3;hCG;0,027736298
PC-3;hCG;0,052636152
PC-3;hCG;0,400511434
PC-3;LH;0,071570233
PC-3;LH;0,106415646
PC-3;LH;0,157994146
DU145;No stimulation;0,022971147
DU145;No stimulation;0,03671567
DU145;No stimulation;0,269411103
DU145;hCG;0,033056031
DU145;hCG;0,079951583
DU145;hCG;0,132618918
DU145;LH;0,025894965
DU145;LH;0,06766857
DU145;LH;0,351062361

## Sheet: MS data
Cell_line;Stimulation;Steroid;level
LNCaP;No stimulation;E1-S;0
LNCaP;No stimulation;E1-S;0
LNCaP;No stimulation;E1-S;0
LNCaP;No stimulation;E1-S;0,536448921
LNCaP;No stimulation;E1-S;0,336103832
LNCaP;No stimulation;E1-S;0,243258181
LNCaP;LH;E1-S;0
LNCaP;LH;E1-S;0
LNCaP;LH;E1-S;0
LNCaP;hCG;E1-S;0
LNCaP;hCG;E1-S;0
LNCaP;hCG;E1-S;0
LNCaP;hCG;E1-S;0,4161313
LNCaP;hCG;E1-S;0,515036335
LNCaP;hCG;E1-S;0,374939963
LNCaP;No stimulation;Cortisone;0,196169303
LNCaP;No stimulation;Cortisone;0,244924066
LNCaP;No stimulation;Cortisone;0,150880621
LNCaP;No stimulation;Cortisone;0,33926507
LNCaP;No stimulation;Cortisone;0,352858231
LNCaP;No stimulation;Cortisone;0,407170289
LNCaP;LH;Cortisone;0,203427557
LNCaP;LH;Cortisone;0,182750395
LNCaP;LH;Cortisone;0,301170219
LNCaP;hCG;Cortisone;0,204425972
LNCaP;hCG;Cortisone;0,21820077
LNCaP;hCG;Cortisone;0,172439617
LNCaP;hCG;Cortisone;0,456231885
LNCaP;hCG;Cortisone;0,41903549
LNCaP;hCG;Cortisone;0,515851927
LNCaP;No stimulation;Progesterone;0,078570318
LNCaP;No stimulation;Progesterone;0,062246701
LNCaP;No stimulation;Progesterone;0,059479758
LNCaP;No stimulation;Progesterone;0,162872882
LNCaP;No stimulation;Progesterone;0,159319747
LNCaP;No stimulation;Progesterone;0,165098547
LNCaP;LH;Progesterone;0,058816613
LNCaP;LH;Progesterone;0,059425745
LNCaP;LH;Progesterone;0,063243715
LNCaP;hCG;Progesterone;0,058553442
LNCaP;hCG;Progesterone;0,057338611
LNCaP;hCG;Progesterone;0,06058949
LNCaP;hCG;Progesterone;0,1573691
LNCaP;hCG;Progesterone;0,166099092
LNCaP;hCG;Progesterone;0,165904122
DU145;No stimulation;E1-S;0
DU145;No stimulation;E1-S;0
DU145;No stimulation;E1-S;0
DU145;No stimulation;E1-S;0
DU145;No stimulation;E1-S;0
DU145;No stimulation;E1-S;0,072305772
DU145;LH;E1-S;0
DU145;LH;E1-S;0
DU145;LH;E1-S;0
DU145;hCG;E1-S;0,045165046
DU145;hCG;E1-S;0
DU145;hCG;E1-S;0
DU145;hCG;E1-S;0
DU145;hCG;E1-S;0,051526685
DU145;hCG;E1-S;0,046279948
DU145;No stimulation;Cortisone;0,353677801
DU145;No stimulation;Cortisone;0,38937142
DU145;No stimulation;Cortisone;0,401800473
DU145;No stimulation;Cortisone;0,285196575
DU145;No stimulation;Cortisone;0,291624055
DU145;No stimulation;Cortisone;0,267836641
DU145;LH;Cortisone;0,329871368
DU145;LH;Cortisone;0,408714492
DU145;LH;Cortisone;0,340403371
DU145;hCG;Cortisone;0,361865731
DU145;hCG;Cortisone;0,301358277
DU145;hCG;Cortisone;0,382539948
DU145;hCG;Cortisone;0,307767195
DU145;hCG;Cortisone;0,357601987
DU145;hCG;Cortisone;0,334239363
DU145;No stimulation;Progesterone;0
DU145;No stimulation;Progesterone;0
DU145;No stimulation;Progesterone;0
DU145;No stimulation;Progesterone;0
DU145;No stimulation;Progesterone;0,148929695
DU145;No stimulation;Progesterone;0,135984081
DU145;LH;Progesterone;0
DU145;LH;Progesterone;0
DU145;LH;Progesterone;0
DU145;hCG;Progesterone;0
DU145;hCG;Progesterone;0
DU145;hCG;Progesterone;0
DU145;hCG;Progesterone;0,140582769
DU145;hCG;Progesterone;0
DU145;hCG;Progesterone;0,492753506
PC-3;No stimulation;E1-S;0
PC-3;No stimulation;E1-S;0
PC-3;No stimulation;E1-S;0
PC-3;No stimulation;E1-S;0
PC-3;No stimulation;E1-S;0
PC-3;No stimulation;E1-S;0,702
PC-3;LH;E1-S;0
PC-3;LH;E1-S;0
PC-3;LH;E1-S;0
PC-3;LH;E1-S;0
PC-3;LH;E1-S;0
PC-3;LH;E1-S;0,075
PC-3;hCG;E1-S;0
PC-3;hCG;E1-S;0
PC-3;hCG;E1-S;0
PC-3;hCG;E1-S;0
PC-3;hCG;E1-S;0,109
PC-3;hCG;E1-S;0
PC-3;No stimulation;Cortisone;0
PC-3;No stimulation;Cortisone;0
PC-3;No stimulation;Cortisone;0,268235739
PC-3;No stimulation;Cortisone;0,208051176
PC-3;No stimulation;Cortisone;0,285762424
PC-3;No stimulation;Cortisone;0
PC-3;LH;Cortisone;0,265031648
PC-3;LH;Cortisone;0,218217201
PC-3;LH;Cortisone;0
PC-3;LH;Cortisone;0,245785753
PC-3;LH;Cortisone;0
PC-3;LH;Cortisone;0,178190594
PC-3;hCG;Cortisone;0,246393102
PC-3;hCG;Cortisone;0,278984936
PC-3;hCG;Cortisone;0,384123838
PC-3;hCG;Cortisone;0,314732058
PC-3;hCG;Cortisone;0,226749447
PC-3;hCG;Cortisone;0
PC-3;No stimulation;Progesterone;0
PC-3;No stimulation;Progesterone;0
PC-3;No stimulation;Progesterone;0
PC-3;No stimulation;Progesterone;0
PC-3;No stimulation;Progesterone;0
PC-3;No stimulation;Progesterone;0
PC-3;LH;Progesterone;0
PC-3;LH;Progesterone;0
PC-3;LH;Progesterone;0
PC-3;LH;Progesterone;0
PC-3;LH;Progesterone;0
PC-3;LH;Progesterone;0
PC-3;hCG;Progesterone;0
PC-3;hCG;Progesterone;0
PC-3;hCG;Progesterone;0
PC-3;hCG;Progesterone;0
PC-3;hCG;Progesterone;0,043
PC-3;hCG;Progesterone;0

## Sheet: qPCR steroids data
sample;stimulation;Gene;Norm_ct
LNCaP;Testis;CYP19A1;1
LNCaP;Prostate;CYP19A1;0,316421163
LNCaP;Prostate;CYP19A1;0,197216067
LNCaP;Prostate;CYP19A1;0,016446455
DU145;Testis;CYP19A1;1
DU145;Prostate;CYP19A1;0,316421163
DU145;Prostate;CYP19A1;0,197216067
DU145;Prostate;CYP19A1;0,016446455
LNCaP;no stim;CYP19A1;53,0462443
LNCaP;no stim;CYP19A1;146,3944151
LNCaP;no stim;CYP19A1;24,85506618
LNCaP;no stim;CYP19A1;17,86615981
LNCaP;no stim;CYP19A1;48,49320941
LNCaP;no stim;CYP19A1;18,74740923
LNCaP;no stim;CYP19A1;1,821037934
LNCaP;no stim;CYP19A1;5,025610893
LNCaP;no stim;CYP19A1;0,853255852
LNCaP;hCG;CYP19A1;98,80759524
LNCaP;hCG;CYP19A1;65,28142779
LNCaP;hCG;CYP19A1;116,7549608
LNCaP;hCG;CYP19A1;22,95227362
LNCaP;hCG;CYP19A1;20,66506028
LNCaP;hCG;CYP19A1;29,40390784
LNCaP;hCG;CYP19A1;3,391990921
LNCaP;hCG;CYP19A1;2,241062641
LNCaP;hCG;CYP19A1;4,008110571
LNCaP;LH;CYP19A1;110,4092095
LNCaP;LH;CYP19A1;222,9214614
LNCaP;LH;CYP19A1;139,513995
LNCaP;LH;CYP19A1;42,32735206
LNCaP;LH;CYP19A1;109,7264608
LNCaP;LH;CYP19A1;18,5544243
LNCaP;LH;CYP19A1;3,790265672
LNCaP;LH;CYP19A1;7,652727215
LNCaP;LH;CYP19A1;4,789411211
DU145;no stim;CYP19A1;0,132269378
DU145;no stim;CYP19A1;1,799376604
DU145;no stim;CYP19A1;0,060742374
DU145;no stim;CYP19A1;0,087644128
DU145;no stim;CYP19A1;0,139810166
DU145;no stim;CYP19A1;0,132051223
DU145;no stim;CYP19A1;0,060587518
DU145;no stim;CYP19A1;0,021805072
DU145;no stim;CYP19A1;0,241963652
DU145;hCG;CYP19A1;0,447820778
DU145;hCG;CYP19A1;0,905018476
DU145;hCG;CYP19A1;0,006687381
DU145;hCG;CYP19A1;0,082390701
DU145;hCG;CYP19A1;0,439214753
DU145;hCG;CYP19A1;0,072443101
DU145;hCG;CYP19A1;0,086465821
DU145;hCG;CYP19A1;0,308132548
DU145;hCG;CYP19A1;0,048635892
DU145;LH;CYP19A1;0,543786775
DU145;LH;CYP19A1;0,683586963
DU145;LH;CYP19A1;0,123559399
DU145;LH;CYP19A1;0,417405797
DU145;LH;CYP19A1;0,451903022
DU145;LH;CYP19A1;0,190872907
DU145;LH;CYP19A1;0,632280942
DU145;LH;CYP19A1;0,63444488
DU145;LH;CYP19A1;0,072015151
LNCaP;Testis;CYP11A1;1
LNCaP;Prostate;CYP11A1;0,000328401
LNCaP;Prostate;CYP11A1;0,005056458
LNCaP;Prostate;CYP11A1;0,006371313
DU145;Testis;CYP11A1;1
DU145;Prostate;CYP11A1;0,000328401
DU145;Prostate;CYP11A1;0,005056458
DU145;Prostate;CYP11A1;0,006371313
LNCaP;no stim;CYP11A1;0,023602083
LNCaP;no stim;CYP11A1;0,041963631
LNCaP;no stim;CYP11A1;0,047230884
LNCaP;no stim;CYP11A1;0,032440065
LNCaP;no stim;CYP11A1;0,003068666
LNCaP;no stim;CYP11A1;0,01151932
LNCaP;no stim;CYP11A1;0,025332431
LNCaP;no stim;CYP11A1;0,023708908
LNCaP;no stim;CYP11A1;0,013204178
LNCaP;hCG;CYP11A1;0,04698845
LNCaP;hCG;CYP11A1;0,036552891
LNCaP;hCG;CYP11A1;0,007597719
LNCaP;hCG;CYP11A1;0,012712681
LNCaP;hCG;CYP11A1;0,030407173
LNCaP;hCG;CYP11A1;0,067723171
LNCaP;hCG;CYP11A1;0,013678211
LNCaP;hCG;CYP11A1;0,020389139
LNCaP;hCG;CYP11A1;0,097162517
LNCaP;LH;CYP11A1;0,025854607
LNCaP;LH;CYP11A1;0,027291409
LNCaP;LH;CYP11A1;0,077663902
LNCaP;LH;CYP11A1;0,032675342
LNCaP;LH;CYP11A1;0,017594774
LNCaP;LH;CYP11A1;0,015821196
LNCaP;LH;CYP11A1;0,028294994
LNCaP;LH;CYP11A1;0,012746586
LNCaP;LH;CYP11A1;0,01371563
DU145;no stim;CYP11A1;0,001494644
DU145;no stim;CYP11A1;0,035539533
DU145;no stim;CYP11A1;0,001618645
DU145;no stim;CYP11A1;0,087445944
DU145;no stim;CYP11A1;
DU145;no stim;CYP11A1;0,031161573
DU145;no stim;CYP11A1;0,009801817
DU145;no stim;CYP11A1;
DU145;no stim;CYP11A1;0,011484528
DU145;hCG;CYP11A1;0,005259169
DU145;hCG;CYP11A1;0,017761796
DU145;hCG;CYP11A1;0,001677786
DU145;hCG;CYP11A1;0,056263205
DU145;hCG;CYP11A1;1,585564164
DU145;hCG;CYP11A1;0,089101077
DU145;hCG;CYP11A1;0,015619569
DU145;hCG;CYP11A1;0,078066164
DU145;hCG;CYP11A1;0,017902551
DU145;LH;CYP11A1;0,048958571
DU145;LH;CYP11A1;0,062442387
DU145;LH;CYP11A1;0,008822964
DU145;LH;CYP11A1;
DU145;LH;CYP11A1;0,912890051
DU145;LH;CYP11A1;0,208812591
DU145;LH;CYP11A1;0,33372152
DU145;LH;CYP11A1;0,152898724
DU145;LH;CYP11A1;0,03520402
LNCaP;Testis;CYP17A1;1
LNCaP;Prostate;CYP17A1;0,010752463
LNCaP;Prostate;CYP17A1;0,003018401
LNCaP;Prostate;CYP17A1;0,008496341
DU145;Testis;CYP17A1;1
DU145;Prostate;CYP17A1;0,010752463
DU145;Prostate;CYP17A1;0,003018401
DU145;Prostate;CYP17A1;0,008496341
LNCaP;no stim;CYP17A1;0,007942713
LNCaP;no stim;CYP17A1;0,008312639
LNCaP;no stim;CYP17A1;0,009974171
LNCaP;no stim;CYP17A1;0,33515569
LNCaP;no stim;CYP17A1;0,050222373
LNCaP;no stim;CYP17A1;0,01605593
LNCaP;no stim;CYP17A1;0,298025221
LNCaP;no stim;CYP17A1;0,035390706
LNCaP;no stim;CYP17A1;0,01080598
LNCaP;hCG;CYP17A1;0,000405342
LNCaP;hCG;CYP17A1;0,007570114
LNCaP;hCG;CYP17A1;0,018096044
LNCaP;hCG;CYP17A1;0,08323659
LNCaP;hCG;CYP17A1;0,013760099
LNCaP;hCG;CYP17A1;0,020935664
LNCaP;hCG;CYP17A1;0,101724094
LNCaP;hCG;CYP17A1;0,009887889
LNCaP;hCG;CYP17A1;0,010459787
LNCaP;LH;CYP17A1;0,03490631
LNCaP;LH;CYP17A1;0,322626161
LNCaP;LH;CYP17A1;0,0121119
LNCaP;LH;CYP17A1;0,344035974
LNCaP;LH;CYP17A1;0,048265462
LNCaP;LH;CYP17A1;0,067686081
LNCaP;LH;CYP17A1;0,321198338
LNCaP;LH;CYP17A1;0,019111348
LNCaP;LH;CYP17A1;0,055072554
DU145;no stim;CYP17A1;0,035613081
DU145;no stim;CYP17A1;0,240397946
DU145;no stim;CYP17A1;0,026635599
DU145;no stim;CYP17A1;4,68329E-05
DU145;no stim;CYP17A1;
DU145;no stim;CYP17A1;4,27779E-05
DU145;no stim;CYP17A1;0,000416349
DU145;no stim;CYP17A1;
DU145;no stim;CYP17A1;0,000298039
DU145;hCG;CYP17A1;0,021969579
DU145;hCG;CYP17A1;0,166027092
DU145;hCG;CYP17A1;0,031399647
DU145;hCG;CYP17A1;6,65204E-05
DU145;hCG;CYP17A1;0,00023305
DU145;hCG;CYP17A1;4,51506E-05
DU145;hCG;CYP17A1;0,000527198
DU145;hCG;CYP17A1;0,000823236
DU145;hCG;CYP17A1;0,000476899
DU145;LH;CYP17A1;0,927835057
DU145;LH;CYP17A1;
DU145;LH;CYP17A1;0,057253672
DU145;LH;CYP17A1;0,000718713
DU145;LH;CYP17A1;0,000263615
DU145;LH;CYP17A1;9,68227E-05
DU145;LH;CYP17A1;0,003250389
DU145;LH;CYP17A1;0,003600901
DU145;LH;CYP17A1;0,00068413
PC-3;Testis;CYP19A1;1
PC-3;Prostate;CYP19A1;0,100539138
PC-3;Prostate;CYP19A1;0,008470039
PC-3;Prostate;CYP19A1;1,101950625
PC-3;no stim;CYP19A1;0,002828253
PC-3;no stim;CYP19A1;0,002307818
PC-3;no stim;CYP19A1;0,00336895
PC-3;no stim;CYP19A1;0,000951761
PC-3;no stim;CYP19A1;0,02135536
PC-3;no stim;CYP19A1;0,004412009
PC-3;no stim;CYP19A1;0,004949364
PC-3;no stim;CYP19A1;0,001316553
PC-3;no stim;CYP19A1;0,002237198
PC-3;hCG;CYP19A1;0,034113057
PC-3;hCG;CYP19A1;0,00204923
PC-3;hCG;CYP19A1;0,009118655
PC-3;hCG;CYP19A1;0,008293517
PC-3;hCG;CYP19A1;0,024079317
PC-3;hCG;CYP19A1;0,006037728
PC-3;hCG;CYP19A1;0,575965385
PC-3;hCG;CYP19A1;0,022826861
PC-3;hCG;CYP19A1;0,035986281
PC-3;LH;CYP19A1;0,0374771
PC-3;LH;CYP19A1;0,008095019
PC-3;LH;CYP19A1;0,002747902
PC-3;LH;CYP19A1;0,001542815
PC-3;LH;CYP19A1;0,03568485
PC-3;LH;CYP19A1;0,000867562
PC-3;LH;CYP19A1;0,009582982
PC-3;LH;CYP19A1;0,448239726
PC-3;LH;CYP19A1;0,028776839
PC-3;Testis;CYP11A1;1
PC-3;Prostate;CYP11A1;0,000181936
PC-3;Prostate;CYP11A1;0,00021626
PC-3;Prostate;CYP11A1;0,019979756
PC-3;no stim;CYP11A1;1,81811E-05
PC-3;no stim;CYP11A1;1,71779E-05
PC-3;no stim;CYP11A1;2,73523E-05
PC-3;no stim;CYP11A1;1,62988E-05
PC-3;no stim;CYP11A1;1,08417E-05
PC-3;no stim;CYP11A1;2,91878E-05
PC-3;no stim;CYP11A1;0,001674876
PC-3;no stim;CYP11A1;0,001934258
PC-3;no stim;CYP11A1;0,000907083
PC-3;hCG;CYP11A1;1,3095E-05
PC-3;hCG;CYP11A1;1,60388E-05
PC-3;hCG;CYP11A1;1,66239E-05
PC-3;hCG;CYP11A1;1,51435E-05
PC-3;hCG;CYP11A1;1,36372E-05
PC-3;hCG;CYP11A1;2,38368E-05
PC-3;hCG;CYP11A1;0,00376379
PC-3;hCG;CYP11A1;0,001550482
PC-3;hCG;CYP11A1;0,000746904
PC-3;LH;CYP11A1;1,80149E-05
PC-3;LH;CYP11A1;1,7599E-05
PC-3;LH;CYP11A1;7,41949E-06
PC-3;LH;CYP11A1;2,15658E-05
PC-3;LH;CYP11A1;2,486E-05
PC-3;LH;CYP11A1;1,58038E-05
PC-3;LH;CYP11A1;0,001673819
PC-3;LH;CYP11A1;0,001341694
PC-3;LH;CYP11A1;0,001328399
PC-3;Testis;CYP17A1;1
PC-3;Prostate;CYP17A1;0,000965614
PC-3;Prostate;CYP17A1;5,5359E-05
PC-3;Prostate;CYP17A1;0,000295807
PC-3;no stim;CYP17A1;0,000150432
PC-3;no stim;CYP17A1;0,000106116
PC-3;no stim;CYP17A1;0,000237391
PC-3;no stim;CYP17A1;4,37941E-06
PC-3;no stim;CYP17A1;9,47824E-06
PC-3;no stim;CYP17A1;1,61898E-05
PC-3;no stim;CYP17A1;2,22305E-05
PC-3;no stim;CYP17A1;3,2666E-05
PC-3;no stim;CYP17A1;9,70142E-05
PC-3;hCG;CYP17A1;0,000183173
PC-3;hCG;CYP17A1;0,000157157
PC-3;hCG;CYP17A1;0,000152854
PC-3;hCG;CYP17A1;8,70283E-06
PC-3;hCG;CYP17A1;2,39711E-05
PC-3;hCG;CYP17A1;1,05799E-05
PC-3;hCG;CYP17A1;2,90833E-05
PC-3;hCG;CYP17A1;1,1865E-05
PC-3;hCG;CYP17A1;1,65321E-05
PC-3;LH;CYP17A1;5,82079E-06
PC-3;LH;CYP17A1;0,000181871
PC-3;LH;CYP17A1;0,000276662
PC-3;LH;CYP17A1;3,64631E-06
PC-3;LH;CYP17A1;6,35772E-06
PC-3;LH;CYP17A1;2,18052E-05
PC-3;LH;CYP17A1;7,35858E-05
PC-3;LH;CYP17A1;0,000214383
PC-3;LH;CYP17A1;3,23683E-05

## Sheet: Elisa data
,"PSA_rec","timey","Age","diagPSA","bGS","cT","LHCGR","stage1"
1,NA,NA,70.09,20,"","",0.001,"Benign"
2,NA,NA,66.78,2,"","",0.001,"Benign"
3,NA,NA,52.98,4.1,"","",0.001,"Benign"
4,NA,NA,61.91,21,"","",0.001,"Benign"
5,NA,NA,65.18,3.2,"","",0.001,"Benign"
6,NA,NA,63.87,2.4,"","",0.001,"Benign"
7,NA,NA,65.75,9.1,"","",0.001,"Benign"
8,NA,NA,68.81,6,"","",0.02,"Benign"
9,NA,NA,47.72,2.4,"","",0.07,"Benign"
10,NA,NA,73.91,1,"","",0.08,"Benign"
11,NA,NA,47.29,4.7,"","",0.12,"Benign"
12,NA,NA,69.07,5.5,"","",0.14,"Benign"
13,NA,NA,64.55,9,"","",0.22,"Benign"
14,NA,NA,55.24,8,"","",0.42,"Benign"
15,NA,NA,68.59,6.7,"","",0.43,"Benign"
16,NA,NA,71.92,2.2,"","",0.59,"Benign"
17,NA,NA,61.86,3.4,"","",0.93,"Benign"
18,NA,NA,63.33,9.4,"","",1.34,"Benign"
19,NA,NA,57.65,3.1,"","",10,"Benign"
20,NA,NA,57.27,6.1,"","",10,"Benign"
21,1,0.82,65.45,581,"8","T3+4",0.001,"CRPC"
22,1,4,73.37,29,"3+4",NA,0.001,"CRPC"
23,1,2.48,70.99,112,"8","T3+4",0.001,"CRPC"
24,1,9.37,80.57,61,"3+4","T3+4",0.001,"CRPC"
25,1,2.55,61.03,11,"8","T2",0.03,"CRPC"
26,1,1.05,71.28,175,"8","T3+4",0.11,"CRPC"
27,1,12.46,79.67,NA,"6","T2",0.28,"CRPC"
28,1,10.83,77.85,NA,"8","T3+4",1.37,"CRPC"
29,1,5.86,75.8,65,"8","T3+4",2.93,"CRPC"
30,1,6.17,74.54,91,"3+4","T3+4",0.001,"CRPC"
31,1,2.51,68.97,5,"8","T3+4",0.001,"CRPC"
32,1,2.5,83.41,13,"8","T3+4",0.001,"CRPC"
33,1,0.46,74.18,2870,"8","T3+4",0.001,"CRPC"
34,1,1.82,61.96,73,"8","T3+4",0.01,"CRPC"
35,1,3.32,74.97,8.5,"8","T3+4",0.04,"CRPC"
36,1,0.5,56.31,74,"3+4","T3+4",0.05,"CRPC"
37,1,1.02,69.09,260,"4+3","T2",0.15,"CRPC"
38,1,0.85,70.94,380,"8","T2",4.8,"CRPC"
39,1,1.51,66.22,6.2,"8","T2",0.001,"Lymphnode positive"
40,1,3.29,66.93,6,"8","T2",0.001,"Lymphnode positive"
41,1,2.08,68.62,67,"8","T3+4",0.001,"Lymphnode positive"
42,0,7.33,67.09,144,"8","T3+4",0.001,"Lymphnode positive"
43,1,1.15,65.83,37,"3+4","T3+4",0.001,"Lymphnode positive"
44,1,0.23,53.56,5.4,"4+3","T3+4",0.001,"Lymphnode positive"
45,0,1.44,73.83,5.7,NA,"T3+4",0.001,"Lymphnode positive"
46,1,0.41,65.65,20,"8","T2",0.001,"Lymphnode positive"
47,1,1.49,70.76,20,"3+4","T3+4",0.001,"Lymphnode positive"
48,1,0.06,59.27,23,"4+3","T2",0.03,"Lymphnode positive"
49,1,1.48,68.26,7.6,"3+4","T2",0.04,"Lymphnode positive"
50,0,5.58,71.25,8.9,"8","T3+4",0.06,"Lymphnode positive"
51,1,2.77,62.7,21,"4+3",NA,0.06,"Lymphnode positive"
52,1,1.12,70.02,24,"8","T2",0.08,"Lymphnode positive"
53,1,0.05,55.85,46,"8","T1",0.08,"Lymphnode positive"
54,1,1.59,71.56,27,"8","T3+4",0.12,"Lymphnode positive"
55,0,6.52,70.88,13,"3+4","T3+4",0.12,"Lymphnode positive"
56,1,4.04,56.55,NA,"4+3","T3+4",0.19,"Lymphnode positive"
57,1,3.1,67.99,25,"8","T3+4",0.79,"Lymphnode positive"
58,1,0.12,65.77,17,"8","T2",5.53,"Lymphnode positive"
59,1,3.21,67.31,2.4,"8","T3+4",0.001,"Metastatic"
60,1,3.46,66.28,1000,"8","T3+4",0.001,"Metastatic"
61,1,0.58,94.58,7.9,NA,"T3+4",0.001,"Metastatic"
62,1,0.58,85.74,36,"8","T1",0.001,"Metastatic"
63,1,1.97,68.02,53,"8","T3+4",0.001,"Metastatic"
64,0,0.45,85.98,709,NA,"T3+4",0.02,"Metastatic"
65,1,1.01,66.57,17,"8","T2",0.02,"Metastatic"
66,1,2.03,72.64,61,"4+3","T3+4",0.02,"Metastatic"
67,1,2.26,60.56,406,"8","T3+4",0.04,"Metastatic"
68,1,0.9,73.56,39,"8","T3+4",0.05,"Metastatic"
69,1,0.98,78.31,300,"8","T3+4",0.05,"Metastatic"
70,1,0.67,62.26,26,"8","T2",0.06,"Metastatic"
71,1,0.94,62.53,3.1,"8","T3+4",0.07,"Metastatic"
72,1,1.46,42.93,NA,"3+4","T2",0.36,"Metastatic"
73,1,3.96,77.54,95,"8","T3+4",0.43,"Metastatic"
74,1,4.04,65.85,14.3,"8","T2",0.52,"Metastatic"
75,1,7.06,66.73,48,"8","T3+4",7.34,"Metastatic"
76,0,4.5,69.11,31,"8","T3+4",10,"Metastatic"
77,0,7.07,58.29,4.3,"6","T1",0.001,"Localised Low"
78,0,6.49,61.68,5.3,"6","T2",0.001,"Localised Low"
79,0,6.8,50.02,9.8,"6","T2",0.001,"Localised Low"
80,0,6.42,58.99,5.7,"6","T1",0.001,"Localised Low"
81,0,7.26,54.16,5.3,"6","T2",0.001,"Localised Low"
82,0,7.23,57.34,NA,"6","T2",0.001,"Localised Low"
83,0,6.59,64.87,5.7,"6","T1",0.001,"Localised Low"
84,0,6.76,63.85,4,"6","T2",0.001,"Localised Intermediate"
85,0,7.32,64.49,6.4,"3+4","T1",0.001,"Localised Intermediate"
86,0,7.33,65.04,9.5,"3+4","T1",0.001,"Localised Intermediate"
87,0,7.12,67.13,12.4,"6","T1",0.001,"Localised Intermediate"
88,0,7.24,59.98,4.7,"3+4","T1",0.001,"Localised Intermediate"
89,0,6.71,66.1,5.5,"3+4","T2",0.001,"Localised Intermediate"
90,0,6.61,58.35,6.5,"6","T2",0.001,"Localised Intermediate"
91,0,7.3,62.29,5.1,"3+4","T1",0.001,"Localised Intermediate"
92,0,6.28,72.79,9.8,"4+3","T2",0.001,"Localised High"
93,0,6.38,68.76,6.6,"4+3","T2",0.001,"Localised High"
94,0,6.38,71.99,7.4,"6","T2",0.001,"Localised High"
95,0,6.61,68.93,16,"6","T2",0.001,"Localised High"
96,1,0.21,54.09,50,"8","T3+4",0.001,"Localised High"
97,1,1,66.14,23,"6","T2",0.001,"Localised High"
98,0,6.84,65.53,7,"6","T1",0.01,"Localised Low"
99,0,6.91,60.46,7,"3+4","T1",0.02,"Localised Intermediate"
100,0,7.23,65.78,6.7,"3+4","T1",0.02,"Localised Intermediate"
101,0,7.01,63.03,25,"6","T1",0.03,"Localised High"
102,0,7.11,65.91,8,"6","T2",0.04,"Localised Intermediate"
103,0,7.16,63.51,8,"6","T1",0.05,"Localised Low"
104,0,7.32,69.74,8.1,"6","T1",0.07,"Localised Low"
105,0,11,73.97,5.3,"3+4","T2",0.09,"Localised Intermediate"
106,0,6.02,65.24,10.9,"3+4","T2",0.1,"Localised High"
107,0,6.23,65.52,8.3,"6","T1",0.12,"Localised Low"
108,0,7.01,64.9,11,"8","T2",0.12,"Localised High"
109,1,0.28,70.45,NA,"3+4","T2",0.12,"Localised High"
110,1,0.1,61.07,20.8,"4+3","T2",0.13,"Localised High"
111,0,6.15,61.82,23,"6","T1",0.14,"Localised Low"
112,1,2.67,62.86,18,"6","T1",0.16,"Localised Intermediate"
113,0,6.67,64.04,10,"6","T1",0.18,"Localised Intermediate"
114,0,5.79,68.05,6.4,"3+4","T2",0.19,"Localised Intermediate"
115,0,6.99,58.25,6.5,"3+4","T1",0.2,"Localised Intermediate"
116,1,2.05,69.42,5.2,"3+4","T1",0.2,"Localised Intermediate"
117,0,7.47,65.77,5,"6","T2",0.22,"Localised Low"
118,0,6.63,64.73,7.5,"3+4","T2",0.24,"Localised High"
119,0,6.25,67.45,17,"3+4","T2",0.24,"Localised High"
120,1,2.7,65.47,23,"3+4","T2",0.27,"Localised High"
121,0,6.03,67.7,2.5,"6","T2",0.28,"Localised High"
122,0,6.77,54.89,7,"3+4","T1",0.31,"Localised Intermediate"
123,0,6.49,68.19,5,"3+4","T1",0.42,"Localised Intermediate"
124,0,6.86,68.83,9,"6","T1",0.49,"Localised Intermediate"
125,0,6.97,66.46,15,"8","T2",0.49,"Localised High"
126,0,7.56,71.1,6.5,"6","T1",0.55,"Localised Low"
127,0,6.92,70.31,20,"4+3","T1",0.61,"Localised High"
128,0,7.11,67.84,6.3,"6","T1",0.62,"Localised Low"
129,0,6.17,64.54,6.1,"6","T1",0.82,"Localised Low"
130,0,7.1,59.5,7.1,"6","T2",0.93,"Localised Low"
131,1,0.75,64.62,31,"8","T2",0.94,"Localised High"
132,0,9.91,70.25,26,"8","T1",1.44,"Localised High"
133,0,7.29,65.63,1.5,"6","T1",1.62,"Localised Low"
134,0,6.05,65.33,4.2,"6","T2",2.97,"Localised High"
135,0,7.01,53.74,9.2,"6","T1",4.29,"Localised Low"
136,0,3.6,62.72,8.3,"6","T2",6.29,"Localised Low"
137,0,4.56,56.74,3.5,"4+3","T3+4",10,"Localised High"
138,0,6.32,64.91,5.9,"4+3","T1",0.001,"Locally advanced"
139,1,3.53,70.07,6.4,"3+4","T2",0.001,"Locally advanced"
140,0,7.11,70.77,9.3,"8","T3+4",0.001,"Locally advanced"
141,0,5.98,59.61,26,"8","T3+4",0.001,"Locally advanced"
142,0,6.04,70.16,17,"8","T2",0.001,"Locally advanced"
143,1,4.06,63.79,8.8,"4+3","T3+4",0.001,"Locally advanced"
144,1,0.08,64.95,4.5,"3+4","T2",0.001,"Locally advanced"
145,0,2.99,69.53,31,"4+3","T3+4",0.001,"Locally advanced"
146,1,1.33,66.51,5.5,"4+3","T2",0.02,"Locally advanced"
147,1,1,69.69,8.3,"4+3","T1",0.02,"Locally advanced"
148,0,6.19,68.25,69,"4+3","T3+4",0.02,"Locally advanced"
149,1,1.48,58.63,23.9,"6","T1",0.04,"Locally advanced"
150,1,6.19,65.02,6.2,"3+4","T2",0.1,"Locally advanced"
151,0,6.97,66.51,14,"3+4","T2",0.18,"Locally advanced"
152,0,6.46,69.35,28,"8","T3+4",0.37,"Locally advanced"
153,0,6.63,66.23,9.4,"4+3","T2",1.2,"Locally advanced"
154,1,1.02,71.29,18,"3+4","T1",1.82,"Locally advanced"
155,0,6.04,70.06,5,"6","T2",2.24,"Locally advanced"
156,0,10.42,59.16,6.5,"6","T3+4",2.49,"Locally advanced"
157,1,1.48,65.79,6.2,"4+3","T3+4",2.54,"Locally advanced"

## Sheet: Rezasurin Data
cell_line;stim;OD
LNCaP;no_stim;1,123375716
LNCaP;no_stim;1,078664245
LNCaP;no_stim;0,910996227
LNCaP;no_stim;1,03507056
LNCaP;no_stim;0,93782311
LNCaP;no_stim;1,075310884
LNCaP;no_stim;0,815984351
LNCaP;no_stim;1,022774906
LNCaP;no_stim;0,823151125
LNCaP;no_stim;1,11039657
LNCaP;no_stim;1,057520543
LNCaP;no_stim;1,01607717
LNCaP;no_stim;0,98463737
LNCaP;no_stim;1,09467667
LNCaP;no_stim;1,084673098
LNCaP;no_stim;0,828867453
LNCaP;no_stim;1,136253041
LNCaP;no_stim;0,949947862
LNCaP;no_stim;0,995828989
LNCaP;no_stim;1,022245395
LNCaP;no_stim;0,955509211
LNCaP;no_stim;1,075078206
LNCaP;no_stim;0,930483142
LNCaP;no_stim;0,827598193
LNCaP;no_stim;1,104275287
LNCaP;no_stim;0,899895725
LNCaP;no_stim;1,080639555
LNCaP;no_stim;1,025026069
LNCaP;no_stim;1,157108099
LNCaP;no_stim;0,765033021
LNCaP;no_stim;1,197427876
LNCaP;no_stim;0,87765033
LNCaP;no_stim;0,989578544
LNCaP;no_stim;0,96137931
LNCaP;no_stim;1,034942529
LNCaP;no_stim;1,019003831
LNCaP;no_stim;1,010421456
LNCaP;no_stim;0,99816092
LNCaP;no_stim;0,972413793
LNCaP;no_stim;1,014099617
LNCaP;no_stim;1,158297681
LNCaP;no_stim;1,071830669
LNCaP;no_stim;0,898896645
LNCaP;no_stim;1,068227877
LNCaP;no_stim;0,898896645
LNCaP;no_stim;0,733168205
LNCaP;no_stim;0,787210088
LNCaP;no_stim;1,028597163
LNCaP;no_stim;0,970952488
LNCaP;no_stim;1,237559108
LNCaP;no_stim;0,949335735
LNCaP;no_stim;0,985363657
LNCaP;no_stim;1,050213916
LNCaP;no_stim;1,0574195
LNCaP;no_stim;0,949335735
LNCaP;no_stim;1,154694889
LNCaP;no_stim;0,942911064
LNCaP;no_stim;0,952347252
LNCaP;no_stim;0,982543053
LNCaP;no_stim;1,025949516
LNCaP;no_stim;0,990092003
LNCaP;no_stim;0,974994102
LNCaP;no_stim;1,097664544
LNCaP;no_stim;1,022175041
LNCaP;no_stim;0,931587639
LNCaP;no_stim;1,003302666
LNCaP;no_stim;0,96933239
LNCaP;no_stim;1,014626091
LNCaP;no_stim;1,067468743
LNCaP;no_stim;1,010851616
LNCaP;no_stim;1,031611229
LNCaP;no_stim;0,982543053
LNCaP;no_stim;1,034629981
LNCaP;no_stim;1,008823529
LNCaP;no_stim;0,926850095
LNCaP;no_stim;1,039184061
LNCaP;no_stim;0,99516129
LNCaP;no_stim;1,020967742
LNCaP;no_stim;0,99971537
LNCaP;no_stim;0,986053131
LNCaP;no_stim;0,958728653
LNCaP;no_stim;0,919259962
LNCaP;no_stim;1,039184061
LNCaP;no_stim;1,068026565
LNCaP;no_stim;1,024003795
LNCaP;no_stim;0,9556926
LNCaP;no_stim;0,973908918
LNCaP;no_stim;1,049810247
LNCaP;no_stim;0,978314576
LNCaP;no_stim;0,895964864
LNCaP;no_stim;0,986000549
LNCaP;no_stim;1,100192149
LNCaP;no_stim;1,058468295
LNCaP;no_stim;1,118858084
LNCaP;no_stim;0,972824595
LNCaP;no_stim;0,889376887
LNCaP;no_stim;0,90628707
LNCaP;no_stim;0,550415184
LNCaP;no_stim;0,939501779
LNCaP;no_stim;1,432977461
LNCaP;no_stim;1,252669039
LNCaP;no_stim;1,513641756
LNCaP;no_stim;0,882562278
LNCaP;no_stim;0,521945433
LNCaP;no_stim;0,887393218
LNCaP;no_stim;0,854258348
LNCaP;no_stim;1,079299336
LNCaP;no_stim;1,030977651
LNCaP;no_stim;1,138665976
LNCaP;no_stim;1,195271378
LNCaP;no_stim;0,901199413
LNCaP;no_stim;0,841832772
LNCaP;no_stim;0,903960652
LNCaP;no_stim;0,892915696
LNCaP;no_stim;1,025455173
LNCaP;no_stim;1,117956683
LNCaP;no_stim;1,142807835
LNCaP;no_stim;1,018552075
LNCaP;no_stim;1,115195444
LNCaP;no_stim;0,854258348
LNCaP;no_stim;0,918835192
LNCaP;no_stim;1,058859975
LNCaP;no_stim;0,947335812
LNCaP;no_stim;1,055142503
LNCaP;no_stim;0,99070632
LNCaP;no_stim;1,097273854
LNCaP;no_stim;1,039033457
LNCaP;no_stim;0,892812887
LNCaP;no_stim;0,968614531
LNCaP;no_stim;1,013005029
LNCaP;no_stim;0,988035374
LNCaP;no_stim;0,935321658
LNCaP;no_stim;1,04074909
LNCaP;no_stim;0,985260968
LNCaP;no_stim;0,943644876
LNCaP;no_stim;1,021328247
LNCaP;no_stim;1,121206867
LNCaP;no_stim;1,035200277
LNCaP;no_stim;0,89093116
LNCaP;no_stim;0,951968094
LNCaP;no_stim;1,026877059
LNCaP;no_stim;1,062944338
LNCaP;no_stim;1,026877059
LNCaP;no_stim;0,988035374
LNCaP;no_stim;1,055098479
LNCaP;no_stim;0,815756669
LNCaP;no_stim;0,891548242
LNCaP;no_stim;0,963350785
LNCaP;no_stim;0,891548242
LNCaP;no_stim;1,055098479
LNCaP;no_stim;1,039142359
LNCaP;no_stim;0,975317876
LNCaP;no_stim;1,150835203
LNCaP;no_stim;1,039142359
LNCaP;no_stim;1,142857143
LNCaP;no_stim;0,943405635
LNCaP;no_stim;1,130890052
LNCaP;no_stim;1,08302169
LNCaP;no_stim;0,899526303
LNCaP;no_stim;0,923460484
LNCaP;no_stim;0,972872681
LNCaP;no_stim;0,876647473
LNCaP;no_stim;0,999488164
LNCaP;no_stim;0,974920026
LNCaP;no_stim;0,98515675
LNCaP;no_stim;0,831605886
LNCaP;no_stim;0,968777991
LNCaP;no_stim;0,940115163
LNCaP;no_stim;1,026103647
LNCaP;no_stim;1,130518234
LNCaP;no_stim;0,931925784
LNCaP;no_stim;1,083429303
LNCaP;no_stim;1,069097889
LNCaP;no_stim;0,997440819
LNCaP;no_stim;1,130518234
LNCaP;no_stim;1,081381958
LNCaP;LH 0.01;1,027246053
LNCaP;LH 0.01;1,105491128
LNCaP;LH 0.01;1,09766662
LNCaP;LH 0.01;0,991476876
LNCaP;LH 0.01;1,134553584
LNCaP;LH 0.01;1,046248428
LNCaP;LH 0.01;1,069721951
LNCaP;LH 0.01;1,095431047
LNCaP;LH 0.01;1,063955509
LNCaP;LH 0.01;0,926312131
LNCaP;LH 0.01;0,841501564
LNCaP;LH 0.01;0,968022245
LNCaP;LH 0.01;0,988877303
LNCaP;LH 0.01;1,120959333
LNCaP;LH 0.01;1,183524505
LNCaP;LH 0.01;0,940215502
LNCaP;LH 0.01;1,070907195
LNCaP;LH 0.01;0,947167188
LNCaP;LH 0.01;0,895724713
LNCaP;LH 0.01;0,97080292
LNCaP;LH 0.01;1,065345846
LNCaP;LH 0.01;1,080639555
LNCaP;LH 0.01;1,105665624
LNCaP;LH 0.01;1,13208203
LNCaP;LH 0.01;0,99816092
LNCaP;LH 0.01;1,004291188
LNCaP;LH 0.01;1,033716475
LNCaP;LH 0.01;0,971187739
LNCaP;LH 0.01;1,054559387
LNCaP;LH 0.01;1,059463602
LNCaP;LH 0.01;1,006743295
LNCaP;LH 0.01;0,957701149
LNCaP;LH 0.01;1,226750732
LNCaP;LH 0.01;1,197928395
LNCaP;LH 0.01;1,27358703
LNCaP;LH 0.01;1,032199955
LNCaP;LH 0.01;0,866471515
LNCaP;LH 0.01;1,125872551
LNCaP;LH 0.01;1,032199955
LNCaP;LH 0.01;1,024994371
LNCaP;LH 0.01;1,392479171
LNCaP;LH 0.01;1,024994371
LNCaP;LH 0.01;1,259175861
LNCaP;LH 0.01;0,902499437
LNCaP;LH 0.01;1,19072281
LNCaP;LH 0.01;0,970952488
LNCaP;LH 0.01;0,97455528
LNCaP;LH 0.01;0,891691061
LNCaP;LH 0.01;0,808917197
LNCaP;LH 0.01;1,035385704
LNCaP;LH 0.01;0,948572777
LNCaP;LH 0.01;1,042934654
LNCaP;LH 0.01;1,067468743
LNCaP;LH 0.01;1,020287804
LNCaP;LH 0.01;1,058032555
LNCaP;LH 0.01;1,018400566
LNCaP;LH 0.01;0,950460014
LNCaP;LH 0.01;1,001415428
LNCaP;LH 0.01;1,033498467
LNCaP;LH 0.01;1,086341118
LNCaP;LH 0.01;0,99197924
LNCaP;LH 0.01;1,050483605
LNCaP;LH 0.01;1,141071007
LNCaP;LH 0.01;1,048596367
LNCaP;LH 0.01;0,958728653
LNCaP;LH 0.01;0,869165085
LNCaP;LH 0.01;0,948102467
LNCaP;LH 0.01;1,110531309
LNCaP;LH 0.01;0,964800759
LNCaP;LH 0.01;0,934440228
LNCaP;LH 0.01;0,954174573
LNCaP;LH 0.01;0,888899431
LNCaP;LH 0.01;1,019449715
LNCaP;LH 0.01;0,987571157
LNCaP;LH 0.01;0,984535104
LNCaP;LH 0.01;0,949620493
LNCaP;LH 0.01;0,896489564
LNCaP;LH 0.01;0,961764706
LNCaP;LH 0.01;0,976944972
LNCaP;LH 0.01;0,928368121
LNCaP;hCG 0.01;1,006862476
LNCaP;hCG 0.01;1,012352457
LNCaP;hCG 0.01;0,945374691
LNCaP;hCG 0.01;0,958550645
LNCaP;hCG 0.01;1,001372495
LNCaP;hCG 0.01;1,066154268
LNCaP;hCG 0.01;0,860828987
LNCaP;hCG 0.01;1,023332418
LNCaP;hCG 0.01;1,029655991
LNCaP;hCG 0.01;1,053380783
LNCaP;hCG 0.01;0,763938316
LNCaP;hCG 0.01;0,820877817
LNCaP;hCG 0.01;1,005931198
LNCaP;hCG 0.01;1,285883749
LNCaP;hCG 0.01;0,398576512
LNCaP;hCG 0.01;1,100830368
LNCaP;hCG 0.01;0,886012598
LNCaP;hCG 0.01;1,113814824
LNCaP;hCG 0.01;1,021313314
LNCaP;hCG 0.01;1,111053585
LNCaP;hCG 0.01;1,104150488
LNCaP;hCG 0.01;1,06411252
LNCaP;hCG 0.01;0,915005609
LNCaP;hCG 0.01;0,999223402
LNCaP;hCG 0.01;0,934334283
LNCaP;hCG 0.01;1,047545086
LNCaP;hCG 0.01;1,166278367
LNCaP;hCG 0.01;1,054448184
LNCaP;hCG 0.01;0,923289326
LNCaP;hCG 0.01;1,123479161
LNCaP;hCG 0.01;1,113814824
LNCaP;hCG 0.01;0,921908707
LNCaP;hCG 0.01;1,019206939
LNCaP;hCG 0.01;1,034076828
LNCaP;hCG 0.01;1,021685254
LNCaP;hCG 0.01;1,015489467
LNCaP;hCG 0.01;0,993184634
LNCaP;hCG 0.01;1,019206939
LNCaP;hCG 0.01;0,980793061
LNCaP;hCG 0.01;0,93866171
LNCaP;hCG 0.01;1,029651465
LNCaP;hCG 0.01;1,026877059
LNCaP;hCG 0.01;0,915900815
LNCaP;hCG 0.01;0,957516907
LNCaP;hCG 0.01;0,852089475
LNCaP;hCG 0.01;0,957516907
LNCaP;hCG 0.01;0,974163343
LNCaP;hCG 0.01;1,049072308
LNCaP;hCG 0.01;1,065718745
LNCaP;hCG 0.01;0,985260968
LNCaP;hCG 0.01;0,946419282
LNCaP;hCG 0.01;0,943644876
LNCaP;hCG 0.01;0,951968094
LNCaP;hCG 0.01;0,915900815
LNCaP;hCG 0.01;1,043523496
LNCaP;hCG 0.01;1,035200277
LNCaP;hCG 0.01;1,035153328
LNCaP;hCG 0.01;0,83969085
LNCaP;hCG 0.01;1,003241087
LNCaP;hCG 0.01;0,907504363
LNCaP;hCG 0.01;1,023186238
LNCaP;hCG 0.01;0,656195462
LNCaP;hCG 0.01;0,971328846
LNCaP;hCG 0.01;1,007230117
LNCaP;hCG 0.01;1,027175268
LNCaP;hCG 0.01;0,875592122
LNCaP;hCG 0.01;0,915482423
LNCaP;hCG 0.01;1,047120419
LNCaP;hCG 0.01;1,114933932
LNCaP;hCG 0.01;0,935427574
LNCaP;hCG 0.01;1,174769384
LNCaP;hCG 0.01;0,947394665
LNCaP;hCG 0.01;0,974920026
LNCaP;hCG 0.01;1,038387716
LNCaP;hCG 0.01;1,058861164
LNCaP;hCG 0.01;1,11618682
LNCaP;hCG 0.01;1,028150992
LNCaP;hCG 0.01;1,089571337
LNCaP;hCG 0.01;1,077287268
LNCaP;hCG 0.01;1,087523992
LNCaP;hCG 0.01;0,907357646
LNCaP;hCG 0.01;1,071145234
LNCaP;hCG 0.01;1,046577095
LNCaP;hCG 0.01;1,101855406
LNCaP;hCG 0.01;1,009724888
LNCaP;hCG 0.01;1,132565579
LNCaP;hCG 0.01;1,073192578
LNCaP;hCG 0.01;1,050671785
LNCaP;LH 1;1,080899818
LNCaP;LH 1;1,126729076
LNCaP;LH 1;0,961296633
LNCaP;LH 1;1,118904569
LNCaP;LH 1;1,184853989
LNCaP;LH 1;1,084253179
LNCaP;LH 1;0,981416795
LNCaP;LH 1;1,06636859
LNCaP;LH 1;1,073240443
LNCaP;LH 1;1,013219007
LNCaP;LH 1;1,17327617
LNCaP;LH 1;0,830296534
LNCaP;LH 1;0,981779207
LNCaP;LH 1;0,888888889
LNCaP;LH 1;1,024651661
LNCaP;LH 1;0,704537335
LNCaP;LH 1;1,083420229
LNCaP;LH 1;1,173792145
LNCaP;LH 1;1,134862704
LNCaP;LH 1;0,98053528
LNCaP;LH 1;0,945776851
LNCaP;LH 1;0,926312131
LNCaP;LH 1;1,011122697
LNCaP;LH 1;0,962460897
LNCaP;LH 1;1,069516858
LNCaP;LH 1;0,922141119
LNCaP;LH 1;1,140424053
LNCaP;LH 1;1,090371915
LNCaP;LH 1;1,037539103
LNCaP;LH 1;0,905457073
LNCaP;LH 1;1,16127911
LNCaP;LH 1;1,030587417
LNCaP;LH 1;0,838773946
LNCaP;LH 1;1,033716475
LNCaP;LH 1;1,066819923
LNCaP;LH 1;1,045977011
LNCaP;LH 1;1,026360153
LNCaP;LH 1;1,050881226
LNCaP;LH 1;1,070498084
LNCaP;LH 1;0,954022989
LNCaP;LH 1;0,92411619
LNCaP;LH 1;0,95654132
LNCaP;LH 1;0,981760865
LNCaP;LH 1;0,992569241
LNCaP;LH 1;0,981760865
LNCaP;LH 1;0,880882684
LNCaP;LH 1;1,14028372
LNCaP;LH 1;1,14028372
LNCaP;LH 1;1,115064175
LNCaP;LH 1;1,028597163
LNCaP;LH 1;0,934924567
LNCaP;LH 1;0,870074308
LNCaP;LH 1;1,115064175
LNCaP;LH 1;0,718757037
LNCaP;LH 1;0,952938527
LNCaP;LH 1;0,927718982
LNCaP;LH 1;1,044821892
LNCaP;LH 1;0,914602501
LNCaP;LH 1;0,990092003
LNCaP;LH 1;1,022175041
LNCaP;LH 1;1,14673272
LNCaP;LH 1;1,158056145
LNCaP;LH 1;1,06935598
LNCaP;LH 1;1,114649682
LNCaP;LH 1;0,908940788
LNCaP;LH 1;0,905166313
LNCaP;LH 1;0,918376976
LNCaP;LH 1;0,863647087
LNCaP;LH 1;0,82212786
LNCaP;LH 1;0,816466148
LNCaP;LH 1;0,90705355
LNCaP;LH 1;1,041047417
LNCaP;LH 1;1,016413662
LNCaP;LH 1;0,916223909
LNCaP;LH 1;0,887381404
LNCaP;LH 1;0,879791271
LNCaP;LH 1;1,045256167
LNCaP;LH 1;0,885863378
LNCaP;LH 1;1,016413662
LNCaP;LH 1;0,967836812
LNCaP;LH 1;0,990607211
LNCaP;LH 1;0,870683112
LNCaP;LH 1;0,996679317
LNCaP;LH 1;1,002751423
LNCaP;LH 1;1,019449715
LNCaP;LH 1;1,051328273
LNCaP;LH 1;1,078652751
LNCaP;LH 1;1,002751423
LNCaP;hCG 1;0,996980511
LNCaP;hCG 1;0,902552841
LNCaP;hCG 1;0,94866868
LNCaP;hCG 1;0,995882514
LNCaP;hCG 1;1,03431238
LNCaP;hCG 1;0,826791106
LNCaP;hCG 1;1,031018391
LNCaP;hCG 1;1,070546253
LNCaP;hCG 1;0,986951364
LNCaP;hCG 1;0,578884935
LNCaP;hCG 1;0,778173191
LNCaP;hCG 1;0,982206406
LNCaP;hCG 1;1,148279953
LNCaP;hCG 1;0,2514828
LNCaP;hCG 1;1,134045077
LNCaP;hCG 1;1,304863582
LNCaP;hCG 1;0,926050565
LNCaP;hCG 1;0,989559065
LNCaP;hCG 1;0,930192424
LNCaP;hCG 1;1,022693934
LNCaP;hCG 1;0,985417206
LNCaP;hCG 1;0,823884718
LNCaP;hCG 1;0,985417206
LNCaP;hCG 1;1,177323324
LNCaP;hCG 1;0,901199413
LNCaP;hCG 1;1,117956683
LNCaP;hCG 1;1,151091552
LNCaP;hCG 1;1,18836828
LNCaP;hCG 1;0,990939684
LNCaP;hCG 1;0,897057555
LNCaP;hCG 1;0,874967642
LNCaP;hCG 1;1,170420226
LNCaP;hCG 1;0,993184634
LNCaP;hCG 1;0,894052045
LNCaP;hCG 1;0,948574969
LNCaP;hCG 1;0,94361834
LNCaP;hCG 1;0,959727385
LNCaP;hCG 1;0,9622057
LNCaP;hCG 1;0,993184634
LNCaP;hCG 1;0,995662949
LNCaP;hCG 1;1,079590775
LNCaP;hCG 1;1,057395526
LNCaP;hCG 1;0,976937749
LNCaP;hCG 1;0,9547425
LNCaP;hCG 1;1,013005029
LNCaP;hCG 1;1,032425871
LNCaP;hCG 1;1,068493151
LNCaP;hCG 1;1,137853303
LNCaP;hCG 1;1,065718745
LNCaP;hCG 1;1,076816369
LNCaP;hCG 1;1,0906884
LNCaP;hCG 1;1,046297902
LNCaP;hCG 1;1,046297902
LNCaP;hCG 1;0,976937749
LNCaP;hCG 1;1,046297902
LNCaP;hCG 1;1,029651465
LNCaP;hCG 1;1,031164298
LNCaP;hCG 1;1,106955871
LNCaP;hCG 1;1,206681626
LNCaP;hCG 1;1,106955871
LNCaP;hCG 1;1,166791324
LNCaP;hCG 1;1,0710546
LNCaP;hCG 1;1,190725505
LNCaP;hCG 1;1,158813264
LNCaP;hCG 1;1,003241087
LNCaP;hCG 1;0,859636001
LNCaP;hCG 1;0,83969085
LNCaP;hCG 1;0,931438544
LNCaP;hCG 1;0,895537273
LNCaP;hCG 1;0,931438544
LNCaP;hCG 1;0,983295936
LNCaP;hCG 1;1,051109449
LNCaP;hCG 1;1,017914267
LNCaP;hCG 1;0,972872681
LNCaP;hCG 1;1,032245681
LNCaP;hCG 1;0,91759437
LNCaP;hCG 1;1,032245681
LNCaP;hCG 1;1,007677543
LNCaP;hCG 1;1,089571337
LNCaP;hCG 1;0,987204095
LNCaP;hCG 1;1,034293026
LNCaP;hCG 1;0,979014715
LNCaP;hCG 1;1,003582853
LNCaP;hCG 1;1,005630198
LNCaP;hCG 1;0,929878439
LNCaP;hCG 1;0,946257198
LNCaP;hCG 1;0,98925144
LNCaP;hCG 1;0,997440819
PC-3;no_stim;0,821887214
PC-3;no_stim;1,002047273
PC-3;no_stim;0,988646938
PC-3;no_stim;1,021403313
PC-3;no_stim;1,040759352
PC-3;no_stim;1,051181835
PC-3;no_stim;1,002047273
PC-3;no_stim;1,072026801
PC-3;no_stim;0,827938072
PC-3;no_stim;0,777269529
PC-3;no_stim;1,100985222
PC-3;no_stim;1,01653765
PC-3;no_stim;1,13757917
PC-3;no_stim;0,889866291
PC-3;no_stim;1,084095707
PC-3;no_stim;1,16572836
PC-3;no_stim;0,928270042
PC-3;no_stim;1,020534459
PC-3;no_stim;1,000281294
PC-3;no_stim;0,998030942
PC-3;no_stim;0,71673699
PC-3;no_stim;0,757243319
PC-3;no_stim;1,052039381
PC-3;no_stim;0,962025316
PC-3;no_stim;1,054289733
PC-3;no_stim;1,052039381
PC-3;no_stim;0,851758087
PC-3;no_stim;0,993530239
PC-3;no_stim;1,02278481
PC-3;no_stim;0,946272855
PC-3;no_stim;1,0092827
PC-3;no_stim;1,070042194
PC-3;no_stim;0,915573303
PC-3;no_stim;0,815173987
PC-3;no_stim;0,945236737
PC-3;no_stim;1,070735881
PC-3;no_stim;1,00912721
PC-3;no_stim;1,102681118
PC-3;no_stim;1,159726184
PC-3;no_stim;0,981745579
PC-3;no_stim;1,393729493
PC-3;no_stim;1,212905578
PC-3;no_stim;1,18957346
PC-3;no_stim;0,967918338
PC-3;no_stim;0,763762304
PC-3;no_stim;0,792927452
PC-3;no_stim;0,81042654
PC-3;no_stim;0,781261393
PC-3;no_stim;1,329566168
PC-3;no_stim;1,119577105
PC-3;no_stim;0,927087131
PC-3;no_stim;0,822092599
PC-3;no_stim;1,113744076
PC-3;no_stim;1,148742253
PC-3;no_stim;0,728764127
PC-3;no_stim;0,897921983
PC-3;no_stim;1,087597107
PC-3;no_stim;0,830431289
PC-3;no_stim;0,950442004
PC-3;no_stim;0,894722743
PC-3;no_stim;0,98473078
PC-3;no_stim;0,864720064
PC-3;no_stim;1,036163943
PC-3;no_stim;1,036163943
PC-3;no_stim;0,989016877
PC-3;no_stim;1,031877846
PC-3;no_stim;1,049022234
PC-3;no_stim;0,993302973
PC-3;no_stim;1,044736137
PC-3;no_stim;1,006161264
PC-3;no_stim;1,049022234
PC-3;no_stim;1,151888561
PC-3;no_stim;1,032575292
PC-3;no_stim;1,07518951
PC-3;no_stim;0,894898586
PC-3;no_stim;0,921122721
PC-3;no_stim;1,009629174
PC-3;no_stim;1,006351158
PC-3;no_stim;0,967014956
PC-3;no_stim;1,016185208
PC-3;no_stim;1,052243393
PC-3;no_stim;0,986683057
PC-3;no_stim;0,98340504
PC-3;no_stim;0,944068838
PC-3;no_stim;0,944068838
PC-3;no_stim;0,99323909
PC-3;no_stim;1,098135628
PC-3;no_stim;1,07518951
PC-3;no_stim;1,245875252
PC-3;no_stim;1,126760563
PC-3;no_stim;1,017303823
PC-3;no_stim;0,93360161
PC-3;no_stim;0,943259557
PC-3;no_stim;0,970623742
PC-3;no_stim;0,819315895
PC-3;no_stim;0,943259557
PC-3;no_stim;0,99126035
PC-3;no_stim;0,862465501
PC-3;no_stim;0,910303588
PC-3;no_stim;1,050137994
PC-3;no_stim;0,884544618
PC-3;no_stim;0,884544618
PC-3;no_stim;1,193652254
PC-3;no_stim;1,223091076
PC-3;no_stim;0,994719472
PC-3;no_stim;0,8869967
PC-3;no_stim;1,045412541
PC-3;no_stim;1,144686469
PC-3;no_stim;1,305214521
PC-3;no_stim;1,02640264
PC-3;no_stim;1,093993399
PC-3;no_stim;0,796171617
PC-3;no_stim;1,068646865
PC-3;no_stim;0,950363036
PC-3;no_stim;1,022178218
PC-3;no_stim;0,97359736
PC-3;no_stim;0,851089109
PC-3;no_stim;1,015841584
PC-3;no_stim;0,982046205
PC-3;no_stim;0,842640264
PC-3;no_stim;0,939722222
PC-3;no_stim;1,126388889
PC-3;no_stim;0,964166667
PC-3;no_stim;0,888611111
PC-3;no_stim;1,053055556
PC-3;no_stim;0,970833333
PC-3;no_stim;1,110833333
PC-3;no_stim;0,946388889
PC-3;no_stim;1,064287737
PC-3;no_stim;1,000849618
PC-3;no_stim;0,901161144
PC-3;no_stim;1,091475503
PC-3;no_stim;0,919286321
PC-3;no_stim;0,969130558
PC-3;no_stim;0,996318323
PC-3;no_stim;0,937411498
PC-3;no_stim;1,145851034
PC-3;no_stim;1,037099972
PC-3;no_stim;0,946474087
PC-3;no_stim;1,009912206
PC-3;no_stim;0,955536675
PC-3;no_stim;0,964599264
PC-3;no_stim;1,041631266
PC-3;no_stim;1,018974795
PC-3;no_stim;1,038064746
PC-3;no_stim;0,986837424
PC-3;no_stim;0,861615084
PC-3;no_stim;1,083600142
PC-3;no_stim;0,90715048
PC-3;no_stim;0,821771612
PC-3;no_stim;0,918534329
PC-3;no_stim;0,912842405
PC-3;no_stim;1,015297047
PC-3;no_stim;1,049448595
PC-3;no_stim;0,992529349
PC-3;no_stim;1,151903237
PC-3;no_stim;1,089292067
PC-3;no_stim;1,077908218
PC-3;no_stim;1,055140519
PC-3;no_stim;1,038064746
PC-3;no_stim;1,06171108
PC-3;no_stim;1,066199158
PC-3;no_stim;0,895652174
PC-3;no_stim;0,864235624
PC-3;no_stim;0,859747546
PC-3;no_stim;0,980925666
PC-3;no_stim;1,075175316
PC-3;no_stim;0,971949509
PC-3;no_stim;1,070687237
PC-3;no_stim;1,034782609
PC-3;no_stim;1,003366059
PC-3;no_stim;0,971949509
PC-3;no_stim;0,994389902
PC-3;no_stim;1,070687237
PC-3;no_stim;0,962973352
PC-3;no_stim;1,115568022
PC-3;LH 0.01;0,902289224
PC-3;LH 0.01;0,853154662
PC-3;LH 0.01;0,844221106
PC-3;LH 0.01;0,830820771
PC-3;LH 0.01;0,908244928
PC-3;LH 0.01;0,905267076
PC-3;LH 0.01;1,414479806
PC-3;LH 0.01;0,938023451
PC-3;LH 0.01;1,28676988
PC-3;LH 0.01;0,960239268
PC-3;LH 0.01;0,889866291
PC-3;LH 0.01;0,895496129
PC-3;LH 0.01;0,836382829
PC-3;LH 0.01;1,064391274
PC-3;LH 0.01;0,796973962
PC-3;LH 0.01;0,794159043
PC-3;LH 0.01;0,691983122
PC-3;LH 0.01;1,043037975
PC-3;LH 0.01;1,121800281
PC-3;LH 0.01;0,96652602
PC-3;LH 0.01;0,973277075
PC-3;LH 0.01;0,993530239
PC-3;LH 0.01;0,986779184
PC-3;LH 0.01;1,164556962
PC-3;LH 0.01;1,016033755
PC-3;LH 0.01;0,910267229
PC-3;LH 0.01;0,752742616
PC-3;LH 0.01;0,903516174
PC-3;LH 0.01;0,910267229
PC-3;LH 0.01;0,984528833
PC-3;LH 0.01;1,081293952
PC-3;LH 0.01;0,989029536
PC-3;LH 0.01;1,020536224
PC-3;LH 0.01;0,824301198
PC-3;LH 0.01;1,018254421
PC-3;LH 0.01;0,961209355
PC-3;LH 0.01;0,972618369
PC-3;LH 0.01;0,945236737
PC-3;LH 0.01;1,123217342
PC-3;LH 0.01;0,940673132
PC-3;LH 0.01;1,259569814
PC-3;LH 0.01;0,845424717
PC-3;LH 0.01;0,880422895
PC-3;LH 0.01;0,857090777
PC-3;LH 0.01;0,81042654
PC-3;LH 0.01;0,839591688
PC-3;LH 0.01;0,752096245
PC-3;LH 0.01;0,851257747
PC-3;LH 0.01;0,827925629
PC-3;LH 0.01;0,979584397
PC-3;LH 0.01;0,862923806
PC-3;LH 0.01;0,868756836
PC-3;LH 0.01;0,985417426
PC-3;LH 0.01;0,81625957
PC-3;LH 0.01;0,787094422
PC-3;LH 0.01;0,845424717
PC-3;LH 0.01;1,014733458
PC-3;LH 0.01;0,851861773
PC-3;LH 0.01;1,044736137
PC-3;LH 0.01;1,001875167
PC-3;LH 0.01;1,001875167
PC-3;LH 0.01;1,006161264
PC-3;LH 0.01;1,006161264
PC-3;LH 0.01;1,100455398
PC-3;LH 0.01;0,98473078
PC-3;LH 0.01;1,109027592
PC-3;LH 0.01;1,031877846
PC-3;LH 0.01;1,053308331
PC-3;LH 0.01;1,014733458
PC-3;LH 0.01;1,053308331
PC-3;LH 0.01;0,98473078
PC-3;LH 0.01;1,113313689
PC-3;LH 0.01;0,989961074
PC-3;LH 0.01;0,885064536
PC-3;LH 0.01;0,98340504
PC-3;LH 0.01;0,98340504
PC-3;LH 0.01;1,022741242
PC-3;LH 0.01;1,026019258
PC-3;LH 0.01;1,117803729
PC-3;LH 0.01;1,012907191
PC-3;LH 0.01;1,104691662
PC-3;LH 0.01;1,134193813
PC-3;LH 0.01;1,029297275
PC-3;LH 0.01;0,989961074
PC-3;LH 0.01;1,022741242
PC-3;LH 0.01;0,97357099
PC-3;LH 0.01;1,052243393
PC-3;LH 0.01;1,045687359
PC-3;hCG 0.01;1,242655936
PC-3;hCG 0.01;1,063983903
PC-3;hCG 0.01;0,994768612
PC-3;hCG 0.01;1,068812877
PC-3;hCG 0.01;0,915895372
PC-3;hCG 0.01;0,960965795
PC-3;hCG 0.01;0,912676056
PC-3;hCG 0.01;0,954527163
PC-3;hCG 0.01;1,311407544
PC-3;hCG 0.01;0,994940202
PC-3;hCG 0.01;1,370285189
PC-3;hCG 0.01;0,902943882
PC-3;hCG 0.01;1,245170193
PC-3;hCG 0.01;0,961821527
PC-3;hCG 0.01;1,208371665
PC-3;hCG 0.01;0,936062557
PC-3;hCG 0.01;0,895445545
PC-3;hCG 0.01;1,100330033
PC-3;hCG 0.01;1,083432343
PC-3;hCG 0.01;1,284092409
PC-3;hCG 0.01;1,074983498
PC-3;hCG 0.01;1,167920792
PC-3;hCG 0.01;0,711683168
PC-3;hCG 0.01;0,918679868
PC-3;hCG 0.01;1,022178218
PC-3;hCG 0.01;1,047524752
PC-3;hCG 0.01;0,935577558
PC-3;hCG 0.01;0,878547855
PC-3;hCG 0.01;1,051749175
PC-3;hCG 0.01;0,851089109
PC-3;hCG 0.01;1,007392739
PC-3;hCG 0.01;0,768712871
PC-3;hCG 0.01;1,113055556
PC-3;hCG 0.01;0,824166667
PC-3;hCG 0.01;0,9375
PC-3;hCG 0.01;0,993055556
PC-3;hCG 0.01;0,793055556
PC-3;hCG 0.01;0,964166667
PC-3;hCG 0.01;1,170833333
PC-3;hCG 0.01;0,981944444
PC-3;hCG 0.01;0,996318323
PC-3;hCG 0.01;0,905692438
PC-3;hCG 0.01;0,973661852
PC-3;hCG 0.01;0,951005381
PC-3;hCG 0.01;0,978193146
PC-3;hCG 0.01;0,910223733
PC-3;hCG 0.01;1,023506089
PC-3;hCG 0.01;0,969130558
PC-3;hCG 0.01;0,960067969
PC-3;hCG 0.01;1,005380912
PC-3;hCG 0.01;0,815066553
PC-3;hCG 0.01;0,92834891
PC-3;hCG 0.01;0,973661852
PC-3;hCG 0.01;0,914755027
PC-3;hCG 0.01;1,009912206
PC-3;hCG 0.01;0,973661852
PC-3;hCG 0.01;1,020988972
PC-3;hCG 0.01;1,186054785
PC-3;hCG 0.01;0,998221274
PC-3;hCG 0.01;1,203130559
PC-3;hCG 0.01;1,186054785
PC-3;hCG 0.01;1,020988972
PC-3;hCG 0.01;0,992529349
PC-3;hCG 0.01;1,094983991
PC-3;hCG 0.01;0,952685877
PC-3;hCG 0.01;1,311277126
PC-3;hCG 0.01;1,220206332
PC-3;hCG 0.01;1,425115617
PC-3;hCG 0.01;1,311277126
PC-3;hCG 0.01;1,220206332
PC-3;hCG 0.01;1,242974031
PC-3;hCG 0.01;1,100675916
PC-3;hCG 0.01;1,003366059
PC-3;hCG 0.01;1,012342216
PC-3;hCG 0.01;1,012342216
PC-3;hCG 0.01;0,962973352
PC-3;hCG 0.01;0,873211781
PC-3;hCG 0.01;0,922580645
PC-3;hCG 0.01;1,016830295
PC-3;hCG 0.01;1,048246844
PC-3;hCG 0.01;0,976437588
PC-3;hCG 0.01;0,864235624
PC-3;hCG 0.01;0,985413745
PC-3;hCG 0.01;0,945021038
PC-3;hCG 0.01;1,196353436
PC-3;hCG 0.01;0,989901823
PC-3;hCG 0.01;1,052734923
PC-3;hCG 0.01;1,025806452
PC-3;LH 1;1,232830821
PC-3;LH 1;0,932067746
PC-3;LH 1;0,809975805
PC-3;LH 1;0,85017681
PC-3;LH 1;0,891866741
PC-3;LH 1;0,891866741
PC-3;LH 1;0,830820771
PC-3;LH 1;0,869532849
PC-3;LH 1;0,903940887
PC-3;LH 1;1,033427164
PC-3;LH 1;0,903940887
PC-3;LH 1;0,780084448
PC-3;LH 1;0,934904996
PC-3;LH 1;0,929275158
PC-3;LH 1;0,887051372
PC-3;LH 1;0,684377199
PC-3;LH 1;0,818002813
PC-3;LH 1;0,831504923
PC-3;LH 1;1,200562588
PC-3;LH 1;1,263572433
PC-3;LH 1;1,000281294
PC-3;LH 1;1,110548523
PC-3;LH 1;0,763994374
PC-3;LH 1;0,63347398
PC-3;LH 1;1,047538678
PC-3;LH 1;0,872011252
PC-3;LH 1;0,872011252
PC-3;LH 1;1,002531646
PC-3;LH 1;1,011533052
PC-3;LH 1;0,96652602
PC-3;LH 1;0,854008439
PC-3;LH 1;1,029535865
PC-3;LH 1;0,853964632
PC-3;LH 1;1,171135197
PC-3;LH 1;0,9132915
PC-3;LH 1;1,011409013
PC-3;LH 1;1,002281803
PC-3;LH 1;1,077581289
PC-3;LH 1;0,883628066
PC-3;LH 1;1,031945237
PC-3;LH 1;1,195406489
PC-3;LH 1;0,857090777
PC-3;LH 1;0,967918338
PC-3;LH 1;0,897921983
PC-3;LH 1;1,090411958
PC-3;LH 1;1,008749544
PC-3;LH 1;0,927087131
PC-3;LH 1;0,868756836
PC-3;LH 1;0,822092599
PC-3;LH 1;0,991250456
PC-3;LH 1;0,862923806
PC-3;LH 1;0,909588042
PC-3;LH 1;1,078745899
PC-3;LH 1;1,026248633
PC-3;LH 1;0,991250456
PC-3;LH 1;0,851257747
PC-3;LH 1;1,044736137
PC-3;LH 1;0,954728101
PC-3;LH 1;1,049022234
PC-3;LH 1;0,98473078
PC-3;LH 1;1,006161264
PC-3;LH 1;1,027591749
PC-3;LH 1;1,087597107
PC-3;LH 1;0,99758907
PC-3;LH 1;0,954728101
PC-3;LH 1;0,98473078
PC-3;LH 1;0,976158586
PC-3;LH 1;0,869006161
PC-3;LH 1;0,85614787
PC-3;LH 1;0,929011519
PC-3;LH 1;1,001875167
PC-3;LH 1;0,963300295
PC-3;LH 1;1,07518951
PC-3;LH 1;1,05552141
PC-3;LH 1;0,97357099
PC-3;LH 1;1,016185208
PC-3;LH 1;1,035853309
PC-3;LH 1;0,970292973
PC-3;LH 1;0,986683057
PC-3;LH 1;1,058799426
PC-3;LH 1;0,963736939
PC-3;LH 1;1,019463225
PC-3;LH 1;1,081745544
PC-3;LH 1;1,003073141
PC-3;LH 1;1,062077443
PC-3;LH 1;1,124359762
PC-3;LH 1;1,111247695
PC-3;LH 1;1,094857611
PC-3;hCG 1;1,194366197
PC-3;hCG 1;1,007645875
PC-3;hCG 1;1,092957746
PC-3;hCG 1;0,981891348
PC-3;hCG 1;0,891750503
PC-3;hCG 1;0,885311871
PC-3;hCG 1;0,898189135
PC-3;hCG 1;0,967404427
PC-3;hCG 1;1,03173873
PC-3;hCG 1;1,03173873
PC-3;hCG 1;1,164213431
PC-3;hCG 1;1,035418583
PC-3;hCG 1;1,03173873
PC-3;hCG 1;0,972861086
PC-3;hCG 1;1,3850046
PC-3;hCG 1;0,958141674
PC-3;hCG 1;0,903894389
PC-3;hCG 1;0,8869967
PC-3;hCG 1;0,762376238
PC-3;hCG 1;0,948250825
PC-3;hCG 1;0,791947195
PC-3;hCG 1;0,920792079
PC-3;hCG 1;1,087656766
PC-3;hCG 1;1,258745875
PC-3;hCG 1;1,085544554
PC-3;hCG 1;1,1130033
PC-3;hCG 1;1,108778878
PC-3;hCG 1;1,062310231
PC-3;hCG 1;0,620858086
PC-3;hCG 1;0,998943894
PC-3;hCG 1;0,813069307
PC-3;hCG 1;1,055973597
PC-3;hCG 1;1,101944444
PC-3;hCG 1;1,066388889
PC-3;hCG 1;1,090833333
PC-3;hCG 1;1,186388889
PC-3;hCG 1;1,008611111
PC-3;hCG 1;1,059722222
PC-3;hCG 1;1,110833333
PC-3;hCG 1;1,008611111
PC-3;hCG 1;1,000849618
PC-3;hCG 1;1,07788162
PC-3;hCG 1;0,89662985
PC-3;hCG 1;1,363353158
PC-3;hCG 1;0,620220901
PC-3;hCG 1;0,991787029
PC-3;hCG 1;1,04616256
PC-3;hCG 1;0,982724441
PC-3;hCG 1;1,114131974
PC-3;hCG 1;1,0144435
PC-3;hCG 1;0,937411498
PC-3;hCG 1;0,964599264
PC-3;hCG 1;1,055225149
PC-3;hCG 1;0,946474087
PC-3;hCG 1;1,032568677
PC-3;hCG 1;1,055225149
PC-3;hCG 1;1,072216293
PC-3;hCG 1;1,220206332
PC-3;hCG 1;1,248665955
PC-3;hCG 1;1,157595162
PC-3;hCG 1;1,214514408
PC-3;hCG 1;1,174670936
PC-3;hCG 1;1,009605123
PC-3;hCG 1;1,055140519
PC-3;hCG 1;1,203130559
PC-3;hCG 1;1,339736748
PC-3;hCG 1;1,094983991
PC-3;hCG 1;0,975453575
PC-3;hCG 1;1,003913198
PC-3;hCG 1;1,026680896
PC-3;hCG 1;0,969761651
PC-3;hCG 1;1,049448595
PC-3;hCG 1;1,043758766
PC-3;hCG 1;1,021318373
PC-3;hCG 1;0,891164095
PC-3;hCG 1;0,953997195
PC-3;hCG 1;0,994389902
PC-3;hCG 1;1,102103787
PC-3;hCG 1;1,025806452
PC-3;hCG 1;1,06171108
PC-3;hCG 1;0,850771388
PC-3;hCG 1;0,882187938
PC-3;hCG 1;0,904628331
PC-3;hCG 1;0,882187938
PC-3;hCG 1;0,796914446
PC-3;hCG 1;0,980925666
PC-3;hCG 1;0,918092567
PC-3;hCG 1;1,039270687
DU145;no_stim;1,423506238
DU145;no_stim;1,019041366
DU145;no_stim;0,793171372
DU145;no_stim;1,139855548
DU145;no_stim;0,856204859
DU145;no_stim;0,656598818
DU145;no_stim;1,013788575
DU145;no_stim;1,097833224
DU145;no_stim;0,71047619
DU145;no_stim;1,053333333
DU145;no_stim;1,175238095
DU145;no_stim;1,257142857
DU145;no_stim;1,102857143
DU145;no_stim;1,182857143
DU145;no_stim;0,767619048
DU145;no_stim;0,75047619
DU145;no_stim;0,958805702
DU145;no_stim;1,05758222
DU145;no_stim;1,018071613
DU145;no_stim;1,0468066
DU145;no_stim;1,034235043
DU145;no_stim;0,847457627
DU145;no_stim;0,741497362
DU145;no_stim;0,978561006
DU145;no_stim;0,948030082
DU145;no_stim;1,06835784
DU145;no_stim;1,075541587
DU145;no_stim;0,969581322
DU145;no_stim;0,81872264
DU145;no_stim;0,949826019
DU145;no_stim;0,983948816
DU145;no_stim;1,50297452
DU145;no_stim;1,308801591
DU145;no_stim;1,038289408
DU145;no_stim;1,040278468
DU145;no_stim;0,988562904
DU145;no_stim;0,891098956
DU145;no_stim;0,82347091
DU145;no_stim;0,964694182
DU145;no_stim;0,94480358
DU145;no_stim;1,063392347
DU145;no_stim;0,903483724
DU145;no_stim;1,063392347
DU145;no_stim;1,090805254
DU145;no_stim;0,962878355
DU145;no_stim;0,981153626
DU145;no_stim;1,026841805
DU145;no_stim;0,898914906
DU145;no_stim;1,003997716
DU145;no_stim;0,95374072
DU145;no_stim;1,058823529
DU145;no_stim;0,798400914
DU145;no_stim;1,109080525
DU145;no_stim;1,081667619
DU145;no_stim;1,049685894
DU145;no_stim;0,95374072
DU145;no_stim;1,118957346
DU145;no_stim;0,955924171
DU145;no_stim;1,05450237
DU145;no_stim;0,940758294
DU145;no_stim;1,012796209
DU145;no_stim;0,986255924
DU145;no_stim;0,95971564
DU145;no_stim;0,963507109
DU145;no_stim;1,009004739
DU145;no_stim;1,00521327
DU145;no_stim;1,065876777
DU145;no_stim;0,974881517
DU145;no_stim;1,012796209
DU145;no_stim;1,046919431
DU145;no_stim;0,914218009
DU145;no_stim;0,978672986
DU145;no_stim;1,005579171
DU145;no_stim;0,848299681
DU145;no_stim;0,997077577
DU145;no_stim;1,039585547
DU145;no_stim;1,052337938
DU145;no_stim;0,929064825
DU145;no_stim;0,937566419
DU145;no_stim;0,912061637
DU145;no_stim;0,929064825
DU145;no_stim;1,120350691
DU145;no_stim;1,094845909
DU145;no_stim;0,916312434
DU145;no_stim;1,19261424
DU145;no_stim;1,001328374
DU145;no_stim;1,039585547
DU145;no_stim;0,984325186
DU145;no_stim;0,611629576
DU145;no_stim;1,102656138
DU145;no_stim;0,999282125
DU145;no_stim;1,088298636
DU145;no_stim;1,171572146
DU145;no_stim;1,125628141
DU145;no_stim;1,094041637
DU145;no_stim;0,806891601
DU145;no_stim;0,870015949
DU145;no_stim;0,872142477
DU145;no_stim;1,14221159
DU145;no_stim;1,052897395
DU145;no_stim;1,082668793
DU145;no_stim;1,11456672
DU145;no_stim;0,861509835
DU145;no_stim;1,003987241
DU145;no_stim;0,973339209
DU145;no_stim;1,043847086
DU145;no_stim;0,828798061
DU145;no_stim;1,079101025
DU145;no_stim;0,770629062
DU145;no_stim;0,774154456
DU145;no_stim;0,872865484
DU145;no_stim;0,966288421
DU145;no_stim;1,066762146
DU145;no_stim;1,036796298
DU145;no_stim;1,061474055
DU145;no_stim;1,302963534
DU145;no_stim;1,167235871
DU145;no_stim;1,102016085
DU145;no_stim;0,849950424
DU145;no_stim;1,103778782
DU145;no_stim;1,04805726
DU145;no_stim;1,037832311
DU145;no_stim;0,982617587
DU145;no_stim;0,966257669
DU145;no_stim;0,929447853
DU145;no_stim;0,894683027
DU145;no_stim;1,093047035
DU145;no_stim;1,04805726
DU145;no_stim;0,862429126
DU145;no_stim;0,924500149
DU145;no_stim;1,11071322
DU145;no_stim;1,096389138
DU145;no_stim;1,230080573
DU145;no_stim;1,05341689
DU145;no_stim;0,814682184
DU145;no_stim;0,910176067
DU145;no_stim;0,953148314
DU145;no_stim;0,953148314
DU145;no_stim;1,091614443
DU145;no_stim;1,062966279
DU145;no_stim;1,134586691
DU145;no_stim;0,89107729
DU145;no_stim;1,086839749
DU145;no_stim;0,824231573
DU145;no_stim;1,075504323
DU145;no_stim;0,987896254
DU145;no_stim;1,043227666
DU145;no_stim;0,92795389
DU145;no_stim;0,992507205
DU145;no_stim;1,001729107
DU145;no_stim;0,978674352
DU145;no_stim;0,877233429
DU145;no_stim;0,92795389
DU145;no_stim;1,006340058
DU145;no_stim;0,923342939
DU145;no_stim;1,06167147
DU145;no_stim;1,112391931
DU145;no_stim;1,089337176
DU145;no_stim;1,034005764
DU145;no_stim;0,960230548
DU145;no_stim;1,098524763
DU145;no_stim;0,917281349
DU145;no_stim;1,052160169
DU145;no_stim;0,955216017
DU145;no_stim;0,921496312
DU145;no_stim;0,997365648
DU145;no_stim;0,896206533
DU145;no_stim;0,976290832
DU145;no_stim;1,052160169
DU145;no_stim;0,988935722
DU145;no_stim;1,077449947
DU145;no_stim;1,052160169
DU145;no_stim;1,043730242
DU145;no_stim;1,047945205
DU145;no_stim;0,946786091
DU145;no_stim;0,976290832
DU145;LH 0.01;1,003282994
DU145;LH 0.01;1,407747866
DU145;LH 0.01;0,556795798
DU145;LH 0.01;0,604070913
DU145;LH 0.01;0,724885095
DU145;LH 0.01;0,499015102
DU145;LH 0.01;0,509520683
DU145;LH 0.01;0,462245568
DU145;LH 0.01;0,657142857
DU145;LH 0.01;0,883809524
DU145;LH 0.01;1,133333333
DU145;LH 0.01;0,841904762
DU145;LH 0.01;0,958095238
DU145;LH 0.01;1,278095238
DU145;LH 0.01;1,034285714
DU145;LH 0.01;1,24
DU145;LH 0.01;0,957009765
DU145;LH 0.01;1,061174094
DU145;LH 0.01;0,822314513
DU145;LH 0.01;1,003704119
DU145;LH 0.01;1,043214727
DU145;LH 0.01;1,039622853
DU145;LH 0.01;1,088113144
DU145;LH 0.01;0,973173196
DU145;LH 0.01;0,931866652
DU145;LH 0.01;0,983948816
DU145;LH 0.01;0,847457627
DU145;LH 0.01;1,028847233
DU145;LH 0.01;1,115052194
DU145;LH 0.01;1,089909081
DU145;LH 0.01;0,727129869
DU145;LH 0.01;1,010887866
DU145;LH 0.01;1,356539035
DU145;LH 0.01;0,831427151
DU145;LH 0.01;0,859273993
DU145;LH 0.01;0,909000497
DU145;LH 0.01;0,926902039
DU145;LH 0.01;0,811536549
DU145;LH 0.01;0,914967678
DU145;LH 0.01;0,881153655
DU145;LH 0.01;1,013135351
DU145;LH 0.01;1,013135351
DU145;LH 0.01;1,081667619
DU145;LH 0.01;1,022272987
DU145;LH 0.01;1,145631068
DU145;LH 0.01;1,054254712
DU145;LH 0.01;0,912621359
DU145;LH 0.01;0,880639634
DU145;LH 0.01;0,917190177
DU145;LH 0.01;0,821245003
DU145;LH 0.01;0,871501999
DU145;LH 0.01;1,003997716
DU145;LH 0.01;1,026841805
DU145;LH 0.01;1,008566533
DU145;LH 0.01;0,912621359
DU145;LH 0.01;0,935465448
DU145;LH 0.01;0,895260664
DU145;LH 0.01;0,914218009
DU145;LH 0.01;1,043127962
DU145;LH 0.01;1,012796209
DU145;LH 0.01;1,001421801
DU145;LH 0.01;0,948341232
DU145;LH 0.01;0,940758294
DU145;LH 0.01;0,785308057
DU145;LH 0.01;0,91042654
DU145;LH 0.01;0,914218009
DU145;LH 0.01;0,948341232
DU145;LH 0.01;0,861137441
DU145;LH 0.01;0,925592417
DU145;LH 0.01;0,974881517
DU145;LH 0.01;0,921800948
DU145;LH 0.01;0,827014218
DU145;LH 0.01;1,052337938
DU145;LH 0.01;0,912061637
DU145;LH 0.01;1,001328374
DU145;LH 0.01;1,15010627
DU145;LH 0.01;1,001328374
DU145;LH 0.01;1,082093518
DU145;LH 0.01;0,946068013
DU145;LH 0.01;0,916312434
DU145;LH 0.01;1,039585547
DU145;LH 0.01;1,065090329
DU145;LH 0.01;1,158607864
DU145;LH 0.01;1,175611052
DU145;LH 0.01;1,069341126
DU145;LH 0.01;1,116099894
DU145;LH 0.01;0,997077577
DU145;LH 0.01;1,048087141
DU145;hCG 0.01;0,298636037
DU145;hCG 0.01;0,175161522
DU145;hCG 0.01;0,677674085
DU145;hCG 0.01;0,783919598
DU145;hCG 0.01;0,735104092
DU145;hCG 0.01;0,64034458
DU145;hCG 0.01;0,470926059
DU145;hCG 0.01;0,605886576
DU145;hCG 0.01;1,029505582
DU145;hCG 0.01;1,061403509
DU145;hCG 0.01;1,106060606
DU145;hCG 0.01;1,08692185
DU145;hCG 0.01;1,010366826
DU145;hCG 0.01;0,982721956
DU145;hCG 0.01;1,050770867
DU145;hCG 0.01;1,399521531
DU145;hCG 0.01;0,945136058
DU145;hCG 0.01;1,027982814
DU145;hCG 0.01;0,592596673
DU145;hCG 0.01;1,063236752
DU145;hCG 0.01;0,64018949
DU145;hCG 0.01;0,890492453
DU145;hCG 0.01;0,745951305
DU145;hCG 0.01;0,966288421
DU145;hCG 0.01;0,939847967
DU145;hCG 0.01;1,029745511
DU145;hCG 0.01;1,213065991
DU145;hCG 0.01;1,258896111
DU145;hCG 0.01;1,25360802
DU145;hCG 0.01;1,133744629
DU145;hCG 0.01;1,195439022
DU145;hCG 0.01;0,959237634
DU145;hCG 0.01;0,980572597
DU145;hCG 0.01;1,072597137
DU145;hCG 0.01;0,937627812
DU145;hCG 0.01;0,986707566
DU145;hCG 0.01;0,937627812
DU145;hCG 0.01;0,917177914
DU145;hCG 0.01;0,941717791
DU145;hCG 0.01;0,998977505
DU145;hCG 0.01;0,829006267
DU145;hCG 0.01;0,94837362
DU145;hCG 0.01;0,953148314
DU145;hCG 0.01;1,292151597
DU145;hCG 0.01;1,148910773
DU145;hCG 0.01;1,296926291
DU145;hCG 0.01;0,738287078
DU145;hCG 0.01;0,80990749
DU145;hCG 0.01;0,914950761
DU145;hCG 0.01;0,953148314
DU145;hCG 0.01;1,163234855
DU145;hCG 0.01;1,091614443
DU145;hCG 0.01;1,153685467
DU145;hCG 0.01;1,067740973
DU145;hCG 0.01;1,024768726
DU145;hCG 0.01;0,914950761
DU145;hCG 0.01;1,057060519
DU145;hCG 0.01;0,914121037
DU145;hCG 0.01;0,941786744
DU145;hCG 0.01;1,006340058
DU145;hCG 0.01;0,941786744
DU145;hCG 0.01;0,955619597
DU145;hCG 0.01;0,955619597
DU145;hCG 0.01;0,766570605
DU145;hCG 0.01;1,029394813
DU145;hCG 0.01;0,872622478
DU145;hCG 0.01;1,06167147
DU145;hCG 0.01;0,951008646
DU145;hCG 0.01;1,140057637
DU145;hCG 0.01;0,78962536
DU145;hCG 0.01;0,821902017
DU145;hCG 0.01;0,655907781
DU145;hCG 0.01;0,938356164
DU145;hCG 0.01;0,95943098
DU145;hCG 0.01;0,921496312
DU145;hCG 0.01;0,887776607
DU145;hCG 0.01;0,95943098
DU145;hCG 0.01;0,900421496
DU145;hCG 0.01;0,875131718
DU145;hCG 0.01;0,849841939
DU145;hCG 0.01;1,031085353
DU145;hCG 0.01;1,005795574
DU145;hCG 0.01;1,014225501
DU145;hCG 0.01;0,997365648
DU145;hCG 0.01;0,95943098
DU145;hCG 0.01;0,972075869
DU145;hCG 0.01;0,862486828
DU145;hCG 0.01;0,870916754
DU145;LH 1;0,48325673
DU145;LH 1;0,793171372
DU145;LH 1;1,381483913
DU145;LH 1;1,229152988
DU145;LH 1;1,076822062
DU145;LH 1;1,292186474
DU145;LH 1;0,824688116
DU145;LH 1;1,265922521
DU145;LH 1;0,803809524
DU145;LH 1;0,939047619
DU145;LH 1;0,980952381
DU145;LH 1;1,053333333
DU145;LH 1;0,851428571
DU145;LH 1;0,864761905
DU145;LH 1;0,96
DU145;LH 1;0,8
DU145;LH 1;0,969581322
DU145;LH 1;0,709170502
DU145;LH 1;1,080929397
DU145;LH 1;1,045010663
DU145;LH 1;1,07374565
DU145;LH 1;1,03603098
DU145;LH 1;1,03064317
DU145;LH 1;0,960601639
DU145;LH 1;0,942642272
DU145;LH 1;1,01447974
DU145;LH 1;0,971377259
DU145;LH 1;1,097092827
DU145;LH 1;1,231788079
DU145;LH 1;1,01447974
DU145;LH 1;1,109664384
DU145;LH 1;1,016275676
DU145;LH 1;0,922923918
DU145;LH 1;0,855295873
DU145;LH 1;0,918945798
DU145;LH 1;0,82148185
DU145;LH 1;0,885131775
DU145;LH 1;0,976628543
DU145;LH 1;0,881153655
DU145;LH 1;0,950770761
DU145;LH 1;0,821245003
DU145;LH 1;0,871501999
DU145;LH 1;0,871501999
DU145;LH 1;0,908052541
DU145;LH 1;0,967447173
DU145;LH 1;0,981153626
DU145;LH 1;0,821245003
DU145;LH 1;0,729868646
DU145;LH 1;0,620217019
DU145;LH 1;0,697886922
DU145;LH 1;0,761850371
DU145;LH 1;0,707024557
DU145;LH 1;0,770988007
DU145;LH 1;0,684180468
DU145;LH 1;0,7435751
DU145;LH 1;0,624785837
DU145;LH 1;0,978672986
DU145;LH 1;0,936966825
DU145;LH 1;0,952132701
DU145;LH 1;0,925592417
DU145;LH 1;0,948341232
DU145;LH 1;0,978672986
DU145;LH 1;0,906635071
DU145;LH 1;0,887677725
DU145;LH 1;0,948341232
DU145;LH 1;1,00521327
DU145;LH 1;0,914218009
DU145;LH 1;0,77014218
DU145;LH 1;0,876303318
DU145;LH 1;0,91042654
DU145;LH 1;0,921800948
DU145;LH 1;0,876303318
DU145;LH 1;1,124601488
DU145;LH 1;1,069341126
DU145;LH 1;1,158607864
DU145;LH 1;0,890807651
DU145;LH 1;1,001328374
DU145;LH 1;1,043836344
DU145;LH 1;0,971572795
DU145;LH 1;0,997077577
DU145;LH 1;0,916312434
DU145;LH 1;0,929064825
DU145;LH 1;0,946068013
DU145;LH 1;0,984325186
DU145;LH 1;0,6782678
DU145;LH 1;1,005579171
DU145;LH 1;0,903560043
DU145;LH 1;0,899309245
DU145;hCG 1;0,697774587
DU145;hCG 1;0,729361091
DU145;hCG 1;0,677674085
DU145;hCG 1;0,654702082
DU145;hCG 1;0,545585068
DU145;hCG 1;0,692031587
DU145;hCG 1;0,651830581
DU145;hCG 1;0,591529074
DU145;hCG 1;0,872142477
DU145;hCG 1;0,989101542
DU145;hCG 1;1,084795322
DU145;hCG 1;0,921052632
DU145;hCG 1;1,055023923
DU145;hCG 1;0,952950558
DU145;hCG 1;0,961456672
DU145;hCG 1;1,097554492
DU145;hCG 1;0,867577393
DU145;hCG 1;1,045609783
DU145;hCG 1;1,050897874
DU145;hCG 1;0,957474937
DU145;hCG 1;0,860526606
DU145;hCG 1;0,913407513
DU145;hCG 1;0,923983695
DU145;hCG 1;0,999779663
DU145;hCG 1;0,899305938
DU145;hCG 1;0,95571224
DU145;hCG 1;0,890492453
DU145;hCG 1;0,89225515
DU145;hCG 1;0,894017847
DU145;hCG 1;0,966288421
DU145;hCG 1;0,848187727
DU145;hCG 1;1,320590503
DU145;hCG 1;0,968302658
DU145;hCG 1;0,998977505
DU145;hCG 1;0,998977505
DU145;hCG 1;0,833333333
DU145;hCG 1;0,878323108
DU145;hCG 1;0,937627812
DU145;hCG 1;0,851738241
DU145;hCG 1;1,033742331
DU145;hCG 1;0,89107729
DU145;hCG 1;0,97224709
DU145;hCG 1;1,02954342
DU145;hCG 1;1,11071322
DU145;hCG 1;1,101163832
DU145;hCG 1;0,953148314
DU145;hCG 1;0,910176067
DU145;hCG 1;0,762160549
DU145;hCG 1;0,986571173
DU145;hCG 1;0,914950761
DU145;hCG 1;0,80990749
DU145;hCG 1;0,881527902
DU145;hCG 1;0,680990749
DU145;hCG 1;0,747836467
DU145;hCG 1;0,857654432
DU145;hCG 1;0,829006267
DU145;hCG 1;0,794236311
DU145;hCG 1;0,785014409
DU145;hCG 1;0,900288184
DU145;hCG 1;0,812680115
DU145;hCG 1;0,817291066
DU145;hCG 1;0,78962536
DU145;hCG 1;0,849567723
DU145;hCG 1;0,65129683
DU145;hCG 1;0,877233429
DU145;hCG 1;0,821902017
DU145;hCG 1;0,725072046
DU145;hCG 1;0,720461095
DU145;hCG 1;0,752737752
DU145;hCG 1;0,725072046
DU145;hCG 1;0,711239193
DU145;hCG 1;0,655907781
DU145;hCG 1;1,115384615
DU145;hCG 1;0,967860906
DU145;hCG 1;0,976290832
DU145;hCG 1;0,942571128
DU145;hCG 1;0,832982086
DU145;hCG 1;0,934141201
DU145;hCG 1;0,896206533
DU145;hCG 1;0,908851423
DU145;hCG 1;0,807692308
DU145;hCG 1;0,913066386
DU145;hCG 1;0,790832455
DU145;hCG 1;0,951001054
DU145;hCG 1;0,849841939
DU145;hCG 1;0,921496312
DU145;hCG 1;0,858271865
DU145;hCG 1;0,849841939
